# Supplementary material for: Molecular engineering of gCN-based multifunctional photocatalysts via in situ covalent modification
Source: Royal Society of Chemistry journal article supplement (doi:10.1039/d4ta06732k), 2025-01-01
Supplement: d4ta06732k1.pdf [file d4ta06732k1.pdf]

## Supporting Information

### **Molecular engineering of gCN-based multifunctional photocatalysts via in situ covalent modification**

Zhenxing Li<sup>#</sup>, Hong Tu<sup>#</sup>, Taihong Zhang, Jinhong Hu, Xiang Zhou, Liwei Liu, Jian Wu\*, Song Yang\*

State Key Laboratory of Green Pesticide, Key Laboratory of Green Pesticide and Agricultural Bioengineering, Ministry of Education, Center for R&D of Fine Chemicals of Guizhou University, Guiyang, 550025, China

<sup>#</sup> The two authors contribute equally to this work.

\* Corresponding author.

E-mail: jhzx.msm@gmail.com or syang@gzu.edu.cn (S. Yang); jwu6@gzu.edu.cn (J. Wu).

## Contents

|                                                                       |    |
|-----------------------------------------------------------------------|----|
| 1. General procedure of antibacterial and pot experiment.....         | 3  |
| 2. Chemical structure of materials and organic pollutants.....        | 3  |
| 3. Organic pollutants degradation and materials characterization..... | 4  |
| 4. Material reusability.....                                          | 11 |
| 5. High resolution of tetracycline degradation intermediates.....     | 13 |
| 6. Mineralization assay.....                                          | 19 |
| 7. Electron-hole calculation.....                                     | 20 |
| 8. ROS observation.....                                               | 24 |
| 9. Pesticide degradation plant toxicity test.....                     | 25 |
| 10. Relevant<br>Tables.....                                           | 27 |
| 11. References.....                                                   | 33 |

## 1. Multifunctional investigation of catalysts

### 1.1. Antibacterial test of catalyst

To explore the wide application of the prepared catalyst, their inhibitory activity against bacteria *Xoo*, *Psa*, *Xac* was also evaluated. Briefly, catalyst gCN or GCN-X (2 mg) was added to a medium (5 mL) containing bacteria ( $OD_{595} = 0.6$ ) and photoreacted for 30 min under visible light irradiation. Then it was cultured in a shaker (28 °C, 220 rpm) for 24-36 h, and the corresponding inhibition rate was calculated by turbidity method. The damage of reactive oxygen species (ROS) produced by catalyst on the bacteria morphology was observed by TEM (JEM-2100F, Japan). The corresponding ROS detection is achieved by a Fluoromax-4 cP fluorescence spectrophotometer (HORIBA Scientific, Irvine, CA, U.S.A.).<sup>[1,2]</sup>

### 1.2. Pesticide degradation plant toxicity test

Based on pot experiment, the degradation behavior of commercial pesticides (Paraquat, Ningnanmycin and Bismethiazol) by gCN-A and the toxicity of degradation products to plants were simulated. The pesticide concentration was changed to 50 mg/L, the light (450 nm, 12 W) duration was changed to 30 min, and other experimental procedures were the same as before.

## 2. Chemical structure of organic pollutants and materials

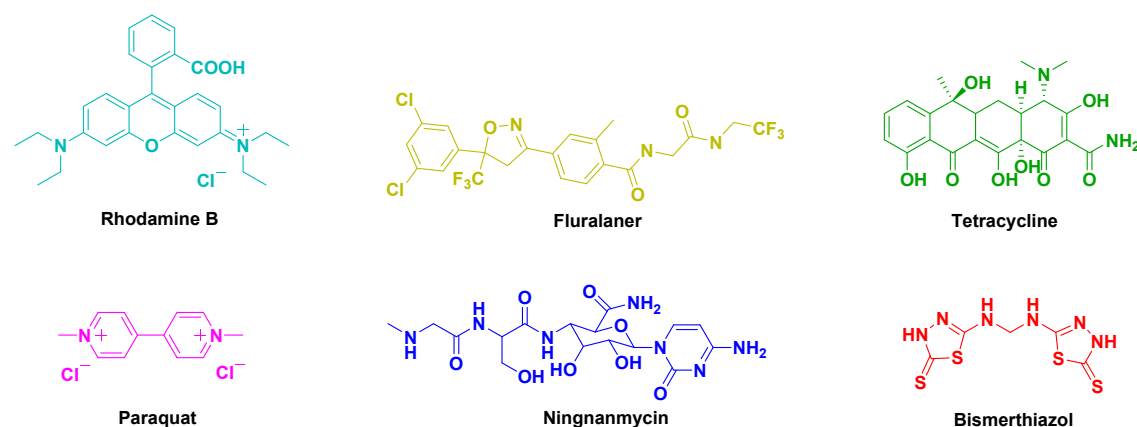

**Fig. S1.** Chemical structure of organic pollutants used for degradation.

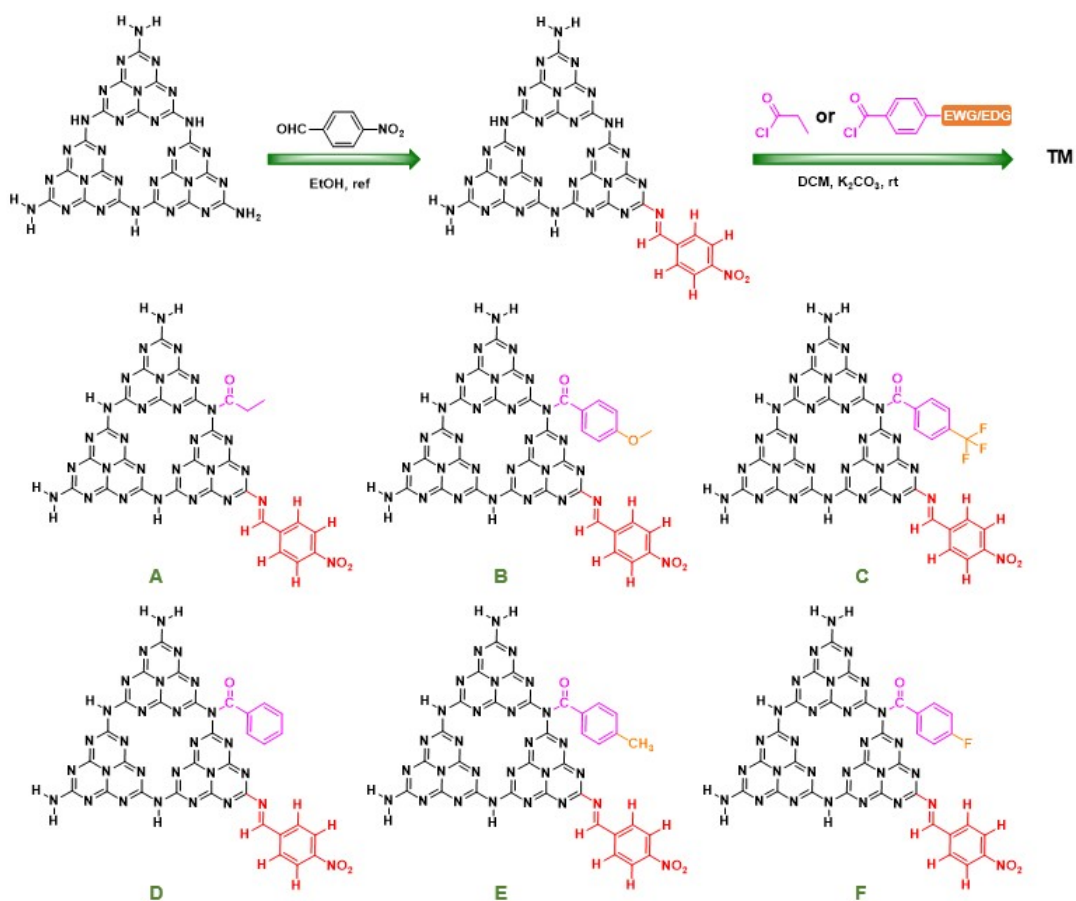

**Fig. S2.** Preparation of target materials. Chemical preparation process of the target material. A-F represents the chemical unit building structure of materials gCN-A to gCN-F, respectively.

### 3. Organic pollutants degradation and materials characterization

#### 3.1. Degradation effect of materials on RhB

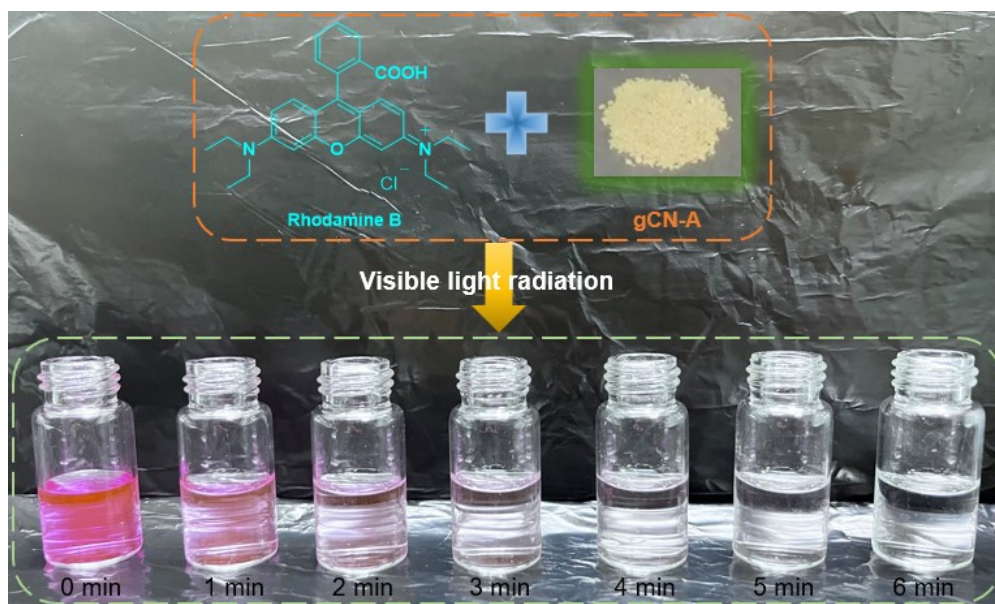

**Fig. S3.** Colour change of RhB solution containing gCN-A under visible light radiation at different times.

### 3.2. Photoluminescence (PL) analysis

Briefly, the parent gCN or catalyst gCN-X powder (2 mg) was dissolved in distilled water (2 mL) and ultrasonicated in a microwave cell for 15 min. Subsequently, the corresponding sample tubes were taken out and allowed to stand for 5 min, and the suspensions (1 mL) were respectively sucked for PL detection using a HORIBA Fluorolog-QM spectrometer (Canada) at 360 nm (scan speed: 1200 nm/min; PMT voltage: 700 V; slit: 5.0 nm). All testing conditions remained consistent within the same batch, with the optimization function turned off.

### 3.3. BET surface comparison

Since the chemical structure of gCN-B/E and gCN-C/F is highly similar, we supplement the BET of gCN-B and gCN-C and find that there is also a similar trend of larger specific surface area. The BET value of gCN-580 is between gCN and gCN-X, as shown in Table S1 and Fig. S4.

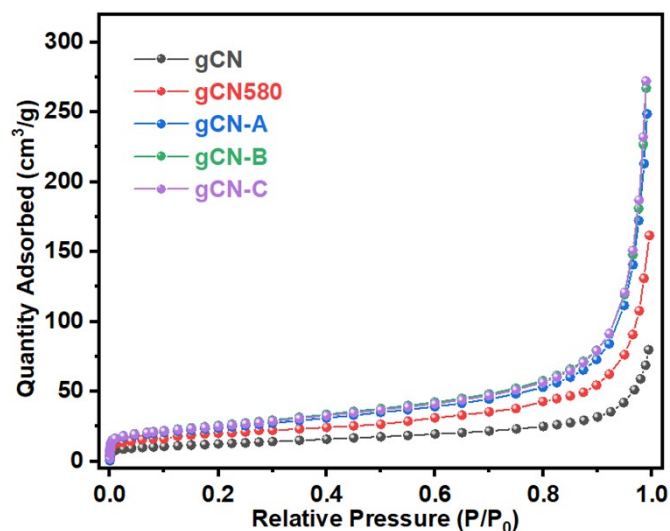

**Fig. S4.** The nitrogen adsorption–desorption isotherms of gCN, gCN580, gCN-A, gCN-B and gCN-C.

### 3.4. DLS experiments

Since the parent gCN and the prepared catalyst gCN-X are slightly soluble in water, the dispersion and dispersion stability of the material in water were not initially investigated. Here, we supplemented dynamic light scattering (DLS) experiments to measure particle size distributions at different time points to assess the dispersion and stability of catalysts in water. The DLS test results of gCN, gCN580 and gCN-X are shown in Fig. S5-S6. The particle size distribution of the catalyst before and after modification changes significantly, and the average particle size of the suspension is sorted as follows: gCN (986.80 nm) > gCN580 (861.09 nm) > gCN-A (565.39 nm) > gCN-D (555.86 nm) > gCN-B (482.82 nm) > gCN-C (311.03 nm). This indicates that the surface modification of hydrophobic chemical groups may improve the dispersion of gCN-X catalyst in water, making the originally large catalyst particles more uniformly dispersed. In addition, gCN-X showed a smaller particle size in water, further indicating improved dispersion. This improvement may allow the catalyst to remain in good suspension for a long time, reducing the risk of sedimentation or aggregation. As a result, the dispersion of the modified material in water is significantly improved.

In order to further investigate the dispersion stability of the catalyst suspension, we placed the catalyst suspension at room temperature for 72 hours and found that no sedimentation or aggregation occurred. The particle size distribution and average

particle size of the catalysts after 0 hours and 72 hours showed that they did not produce significant changes, and maintained high dispersion stability in aqueous solution (Fig. S7).

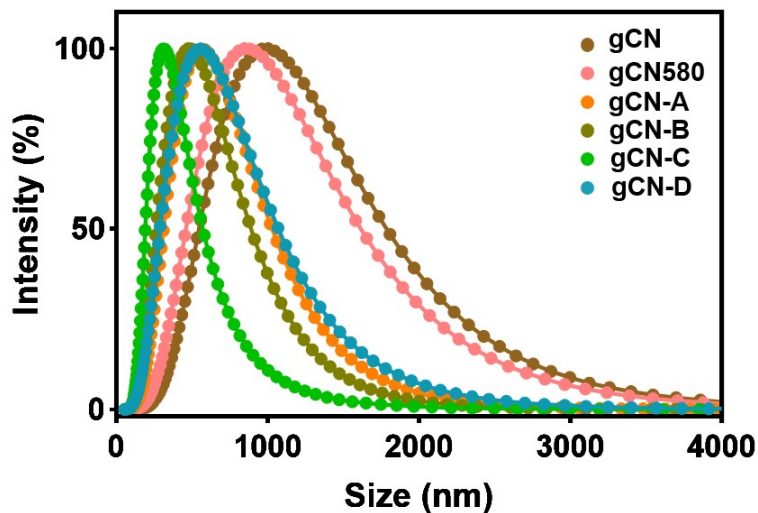

**Fig. S5.** Comparison of particle size distribution of different materials in water.

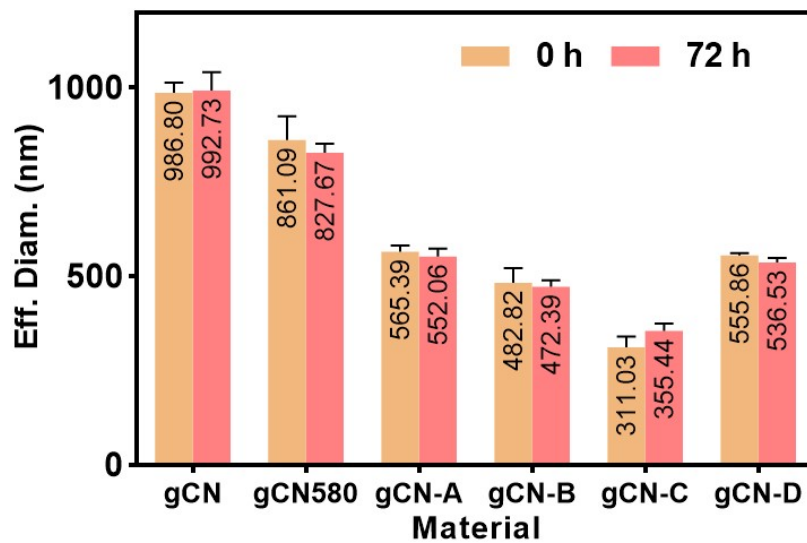

**Fig. S6.** Comparison of average particle size of materials in water at 0 h and 72 h.

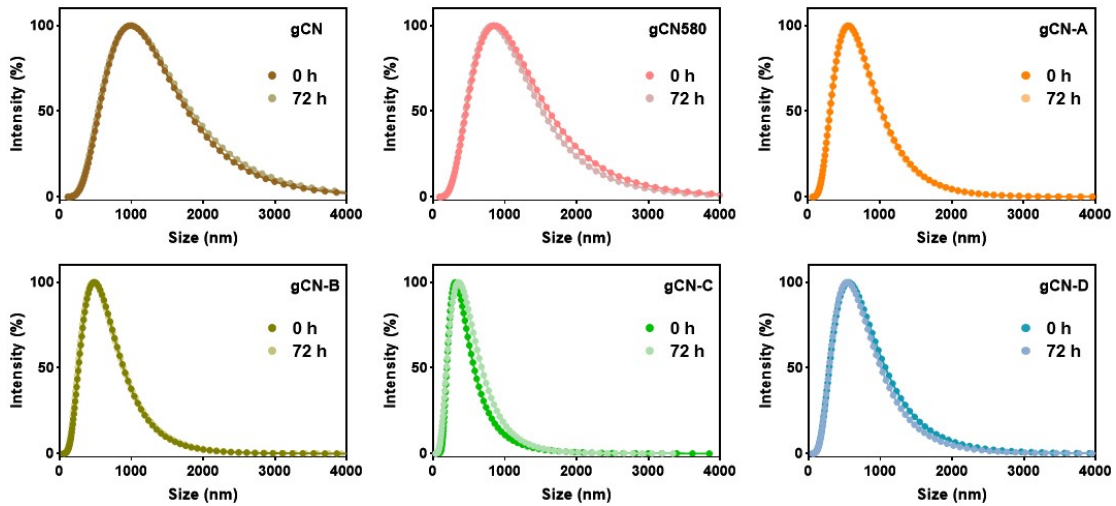

**Fig. S7.** Comparison of particle size distribution of the same material in water at 0 h and 72 h.

### 3.5. TGA experiments

The TGA of gCN, gCN-A and gCN-C (Fig. S8) analysis indicates that the initial decomposition temperatures of the three materials are all around 600 °C. Among them, gCN-A exhibits the highest mass loss percentage (97.51%) and thermal stability (729.41 °C), while the parent gCN has the lowest thermal stability (696.98 °C) and mass loss percentage (94.36%). This indicates that the introduction of chemical groups has improved the thermal stability of gCN-X.

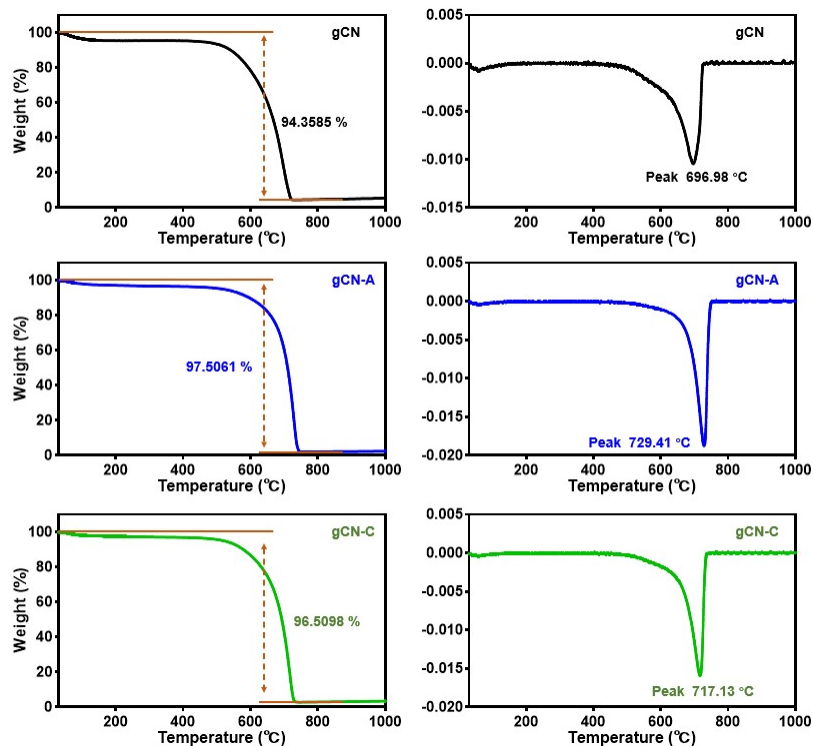



**Fig. S8.** Thermogravimetric analysis comparison of materials gCN, gCN-A, and gCN-C.

### 3.6. Electrochemical properties

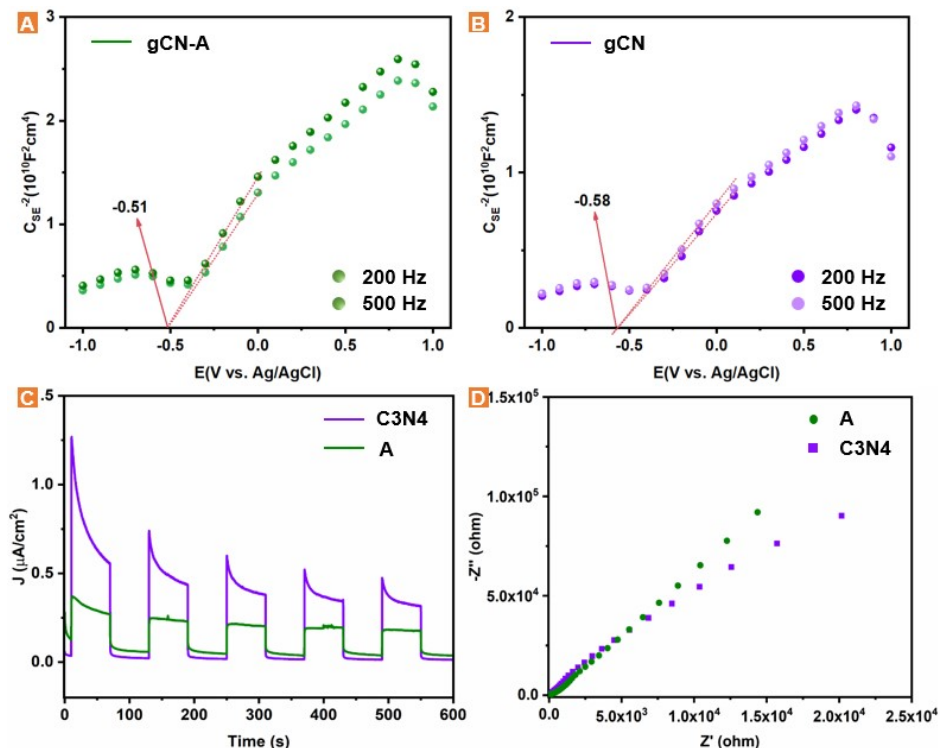

**Fig. S9.** Mott-Schottky plots of gCN (A) and gCN-A (B) at 200 and 500 Hz. Transient photocurrent (C) and EIS Nyquist plots (D) of gCN and gCN-A.

### 3.7. Time-resolved PL spectra

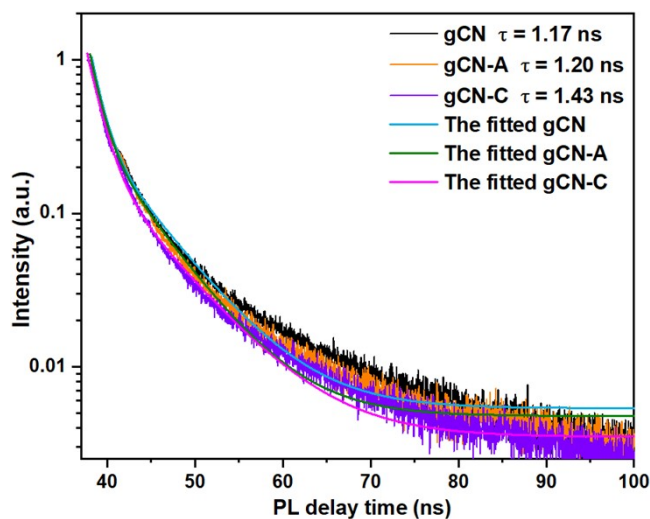

**Fig. S10.** Time-resolved PL spectra of gCN-A, gCN-C and intrinsic gCN (360 nm).

### 3.8. Dark adsorption observation

We added 30 min of dark adsorption observation and took samples at an interval of 10 min. As shown in Fig. S11, during the initial 10 min of dark adsorption, part of RhB will be adsorbed into the catalyst. After dark adsorption equilibrium is reached in 10 to 20 min, the corresponding  $C_t/C_0$  values are defined. After that, the  $C_t/C_0$  values remained almost constant for 20 to 30 min. Therefore, before the photocatalytic degradation reaction, the catalyst and degradation molecules were first subjected to dark adsorption for up to 30 min in order to fully achieve adsorption equilibrium.

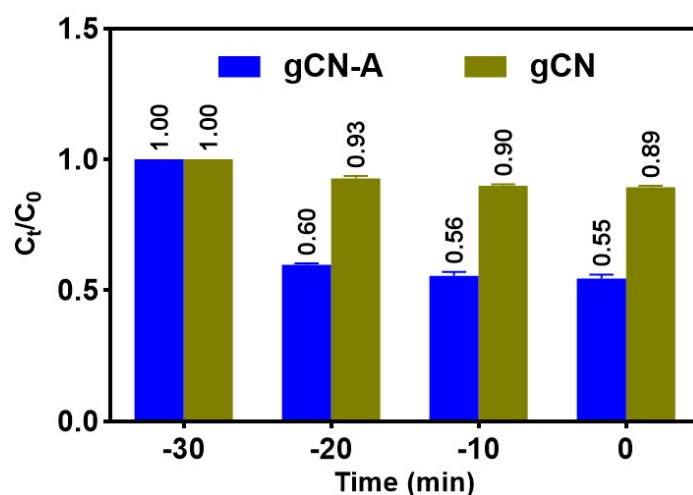

**Fig. S11.** Dark adsorption of RhB (20 mg/L) by gCN and gCN-A within 30 min.

### 3.9. Photocatalytic performance of gCN-A at different wavelengths

According to the existing photocatalytic instrument built-in Settings (including one reactor irradiated by 365 nm light, one reactor irradiated by 395 nm light, one reactor irradiated by 420 nm light, six reactors irradiated by 450 nm light and one reactor irradiated by 510 nm light), we studied the RhB degradation activity of gCN-A and gCN under 365 nm, 395 nm, 420 nm and 510 nm respectively. As shown in Fig. S12, gCN-A and gCN exhibited approximately poor photocatalytic degradation activity in the near ultraviolet region (365 nm and 395 nm). However, in the visible region, gCN-A shows many times better catalytic performance than gCN at 420 nm, 450 nm, or 510 nm, especially at 510 nm. Therefore, to avoid overly arbitrary conclusions, we conclude that gCN-A has the potential to perform better than substrate gCN under sunlight.

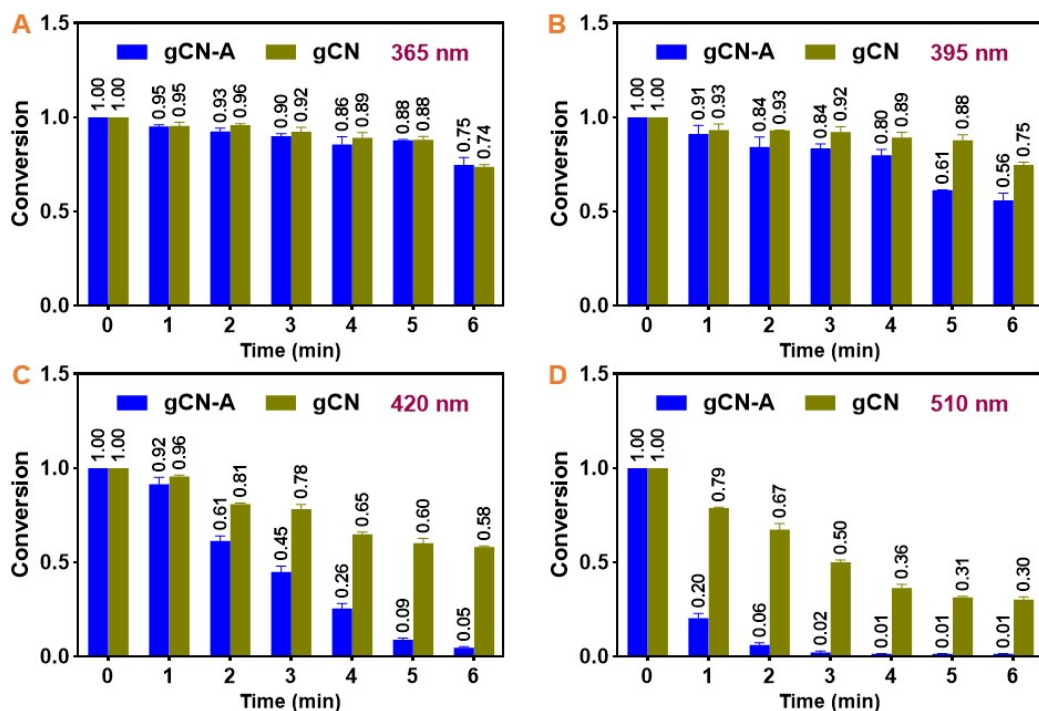

**Fig. S12.** Conversion of catalyst gCN and gCN-A to RhB under different wavelengths of light.

### 3.10. Degradation kinetic model

In order to reconfirm the kinetic model of gCN-A, the degradation of RhB by gCN-A under visible light was tested again. After 6 min of illumination, the degradation rate of RhB by gCN-A reached more than 95%. To better reflect the photocatalytic activity of gCN-A, only 0 to 6 min were used for kinetic simulation fitting, while other catalysts were fitted within 10 min. The degradation rate of RhB by gCN-A is  $0.5319 \text{ min}^{-1}$ ,  $R^2 = 0.955$  (Fig. 4). We chose the pseudo-first-order kinetic model based on the support of relevant literature and the observation of previous data.<sup>[3-5]</sup> We believe that this model can well describe the photocatalytic degradation behavior of materials, and the  $R^2$  of gCN-A is close to 1, which indicates a good fit between the model and the experimental data. This result supports our belief that first-order kinetics model is appropriate when describing these data.

## 4. Material reusability

Reusability and stability serve as crucial benchmarks for the practical implementation of photocatalysts. We chose RhB as the subject of the reusability experiment because

RhB is more visually distinguishable in degradation and easy to detect in batches. The removal of RhB by gCN-A still exceeded 95% after five cycles (Fig. S13), highlighting the excellent photocatalytic performance of gCN-A. Concurrently, XRD, SEM, and FT-IR analysis (Fig. S14) revealed no significant alteration in gCN-A microscopic/chemical structure, affirming its remarkable built-in stability and economic viability.<sup>[6,7]</sup>

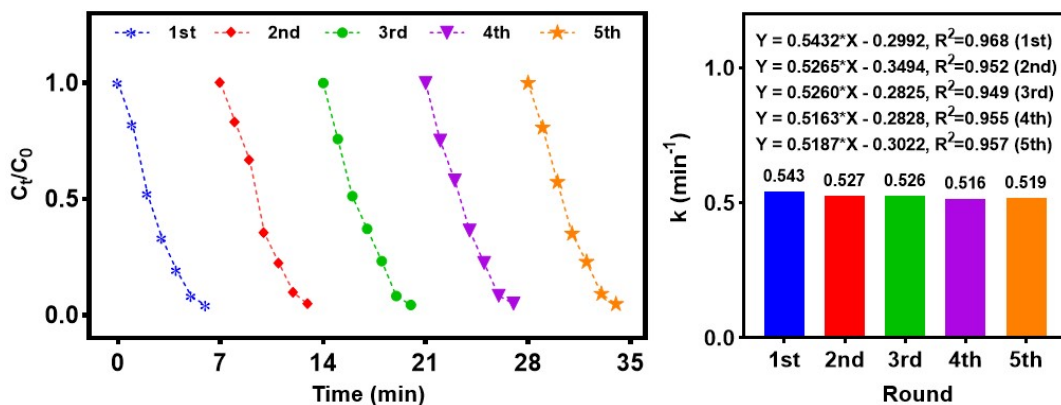

**Fig. S13.** Cycle measurement of RhB degradation and derived rate constants vs cycle round catalyzed by gCN-A.

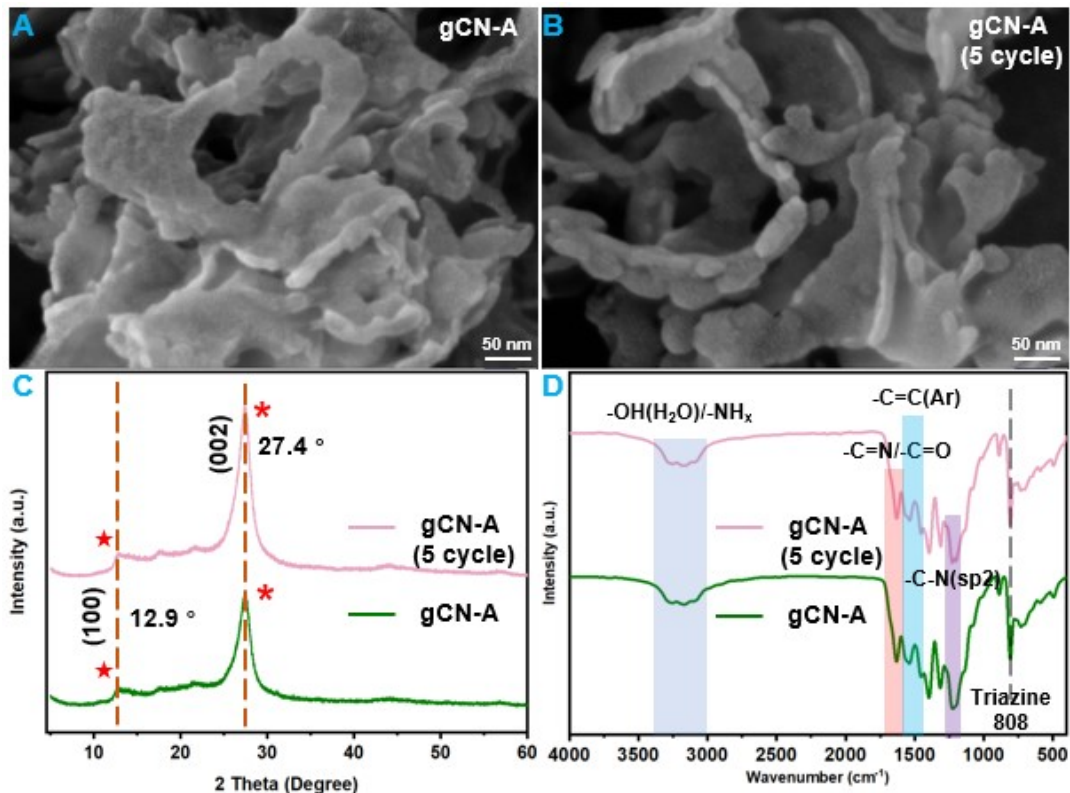

**Fig. S14.** The SEM image (A and B), XRD (C) and FT-IR (D) spectrum comparison between gCN-A and gCN-A (after five cycles).

## 5. High resolution of tetracycline degradation intermediates

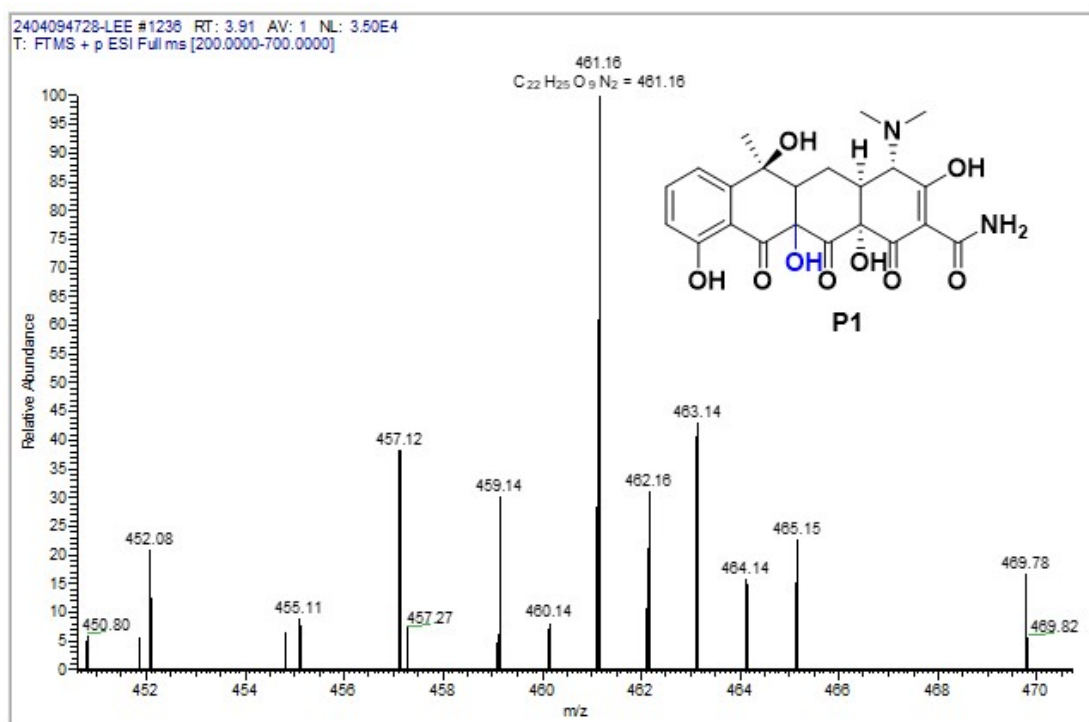

Fig. S15. Mass spectrometry analysis of intermediate P1.

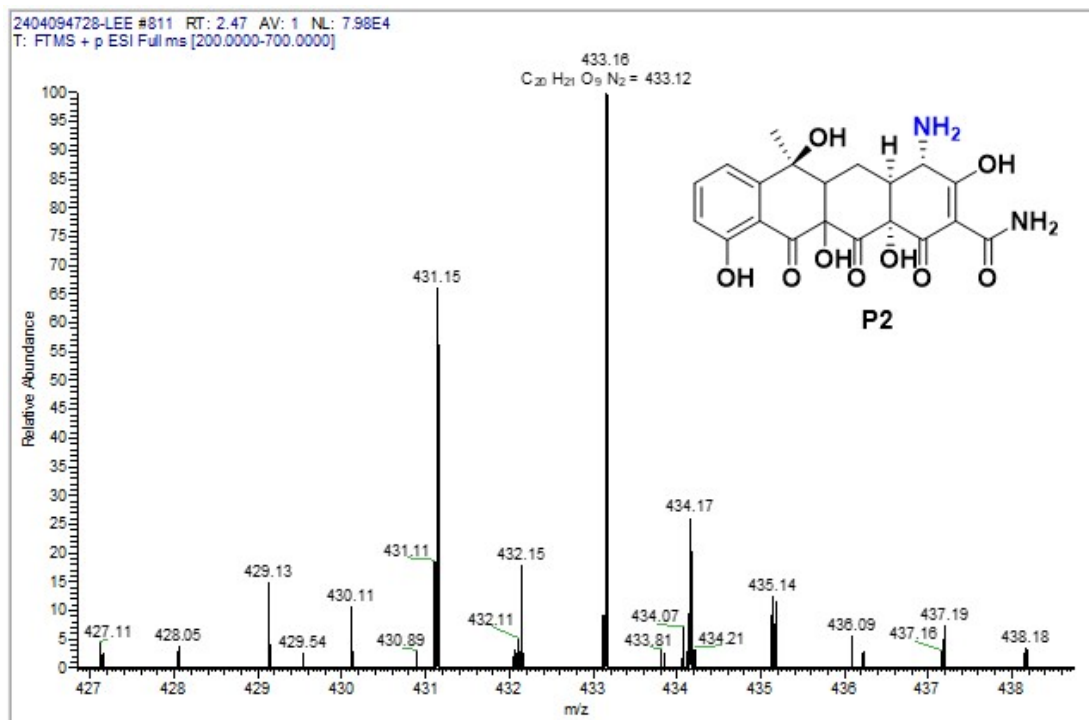

Fig. S16. Mass spectrometry analysis of intermediate P2.

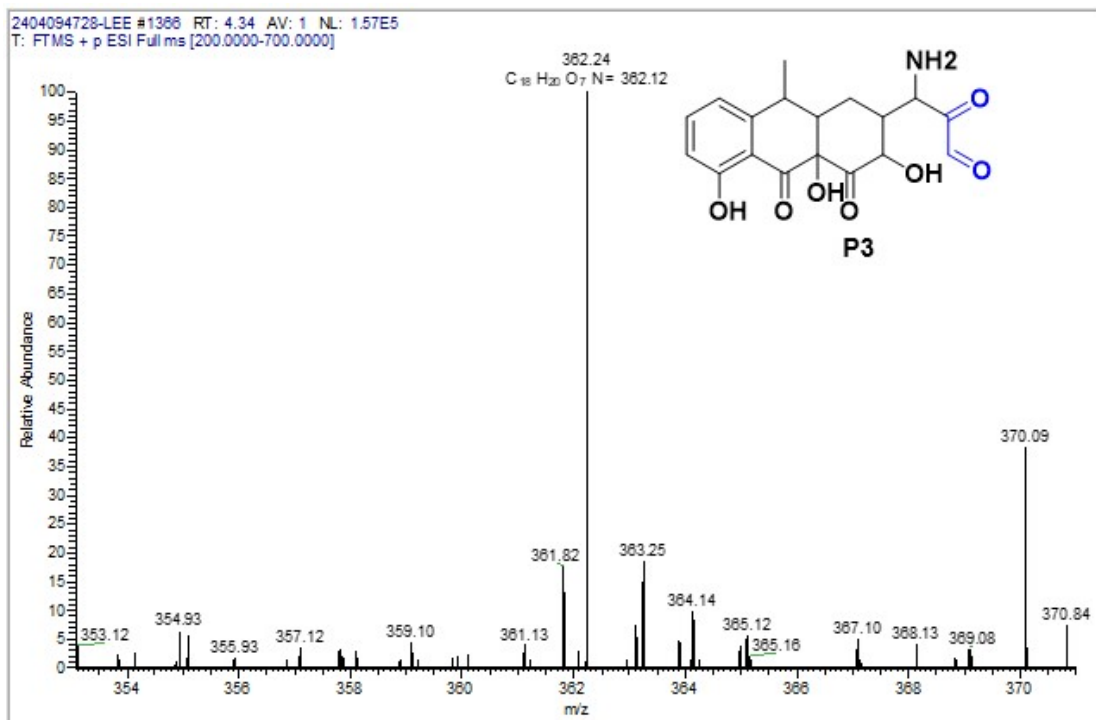

**Fig. S17.** Mass spectrometry analysis of intermediate P3

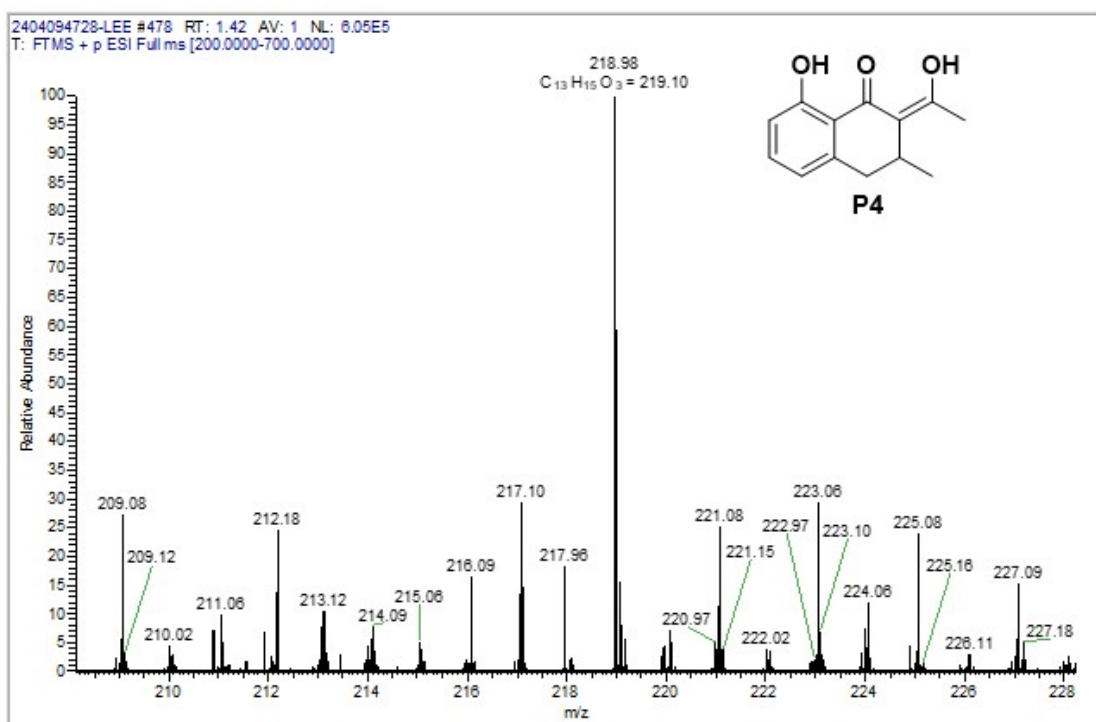

**Fig. S18.** Mass spectrometry analysis of intermediate P4.

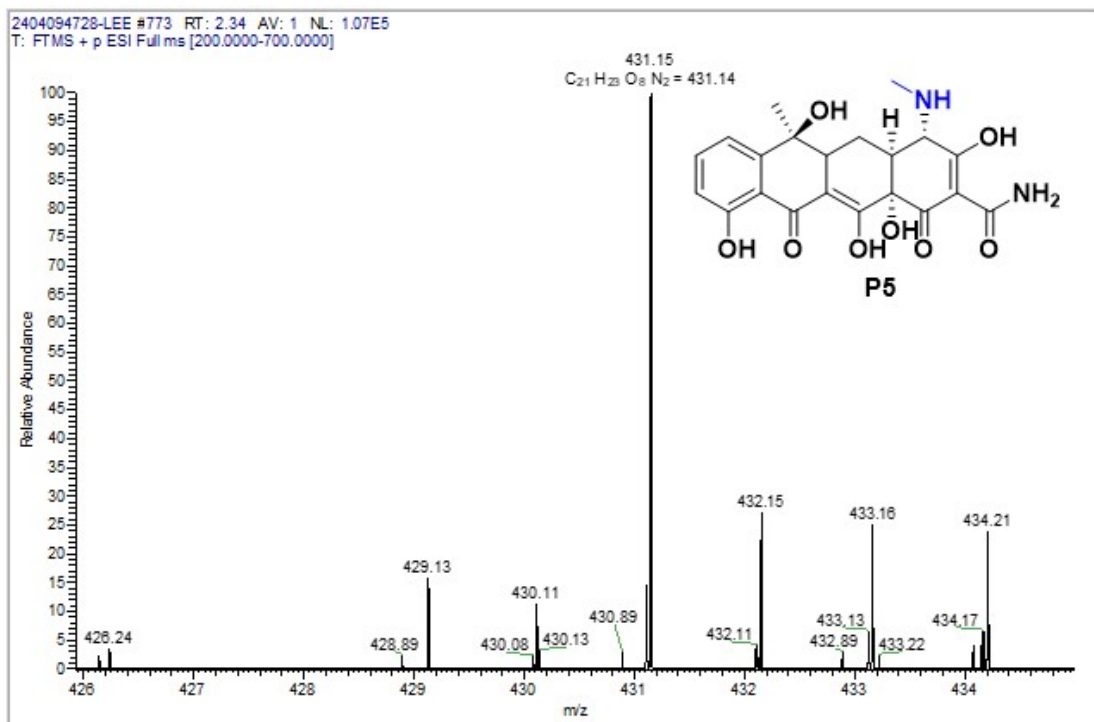

Fig. S19. Mass spectrometry analysis of intermediate P5.

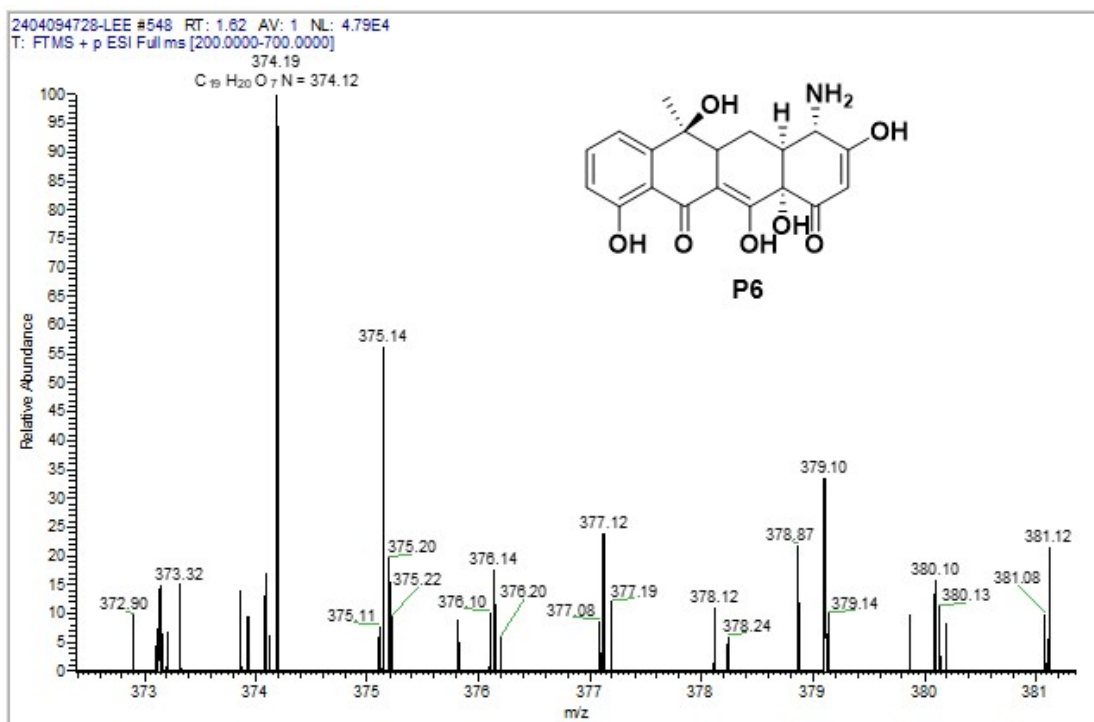

Fig. S20. Mass spectrometry analysis of intermediate P6.

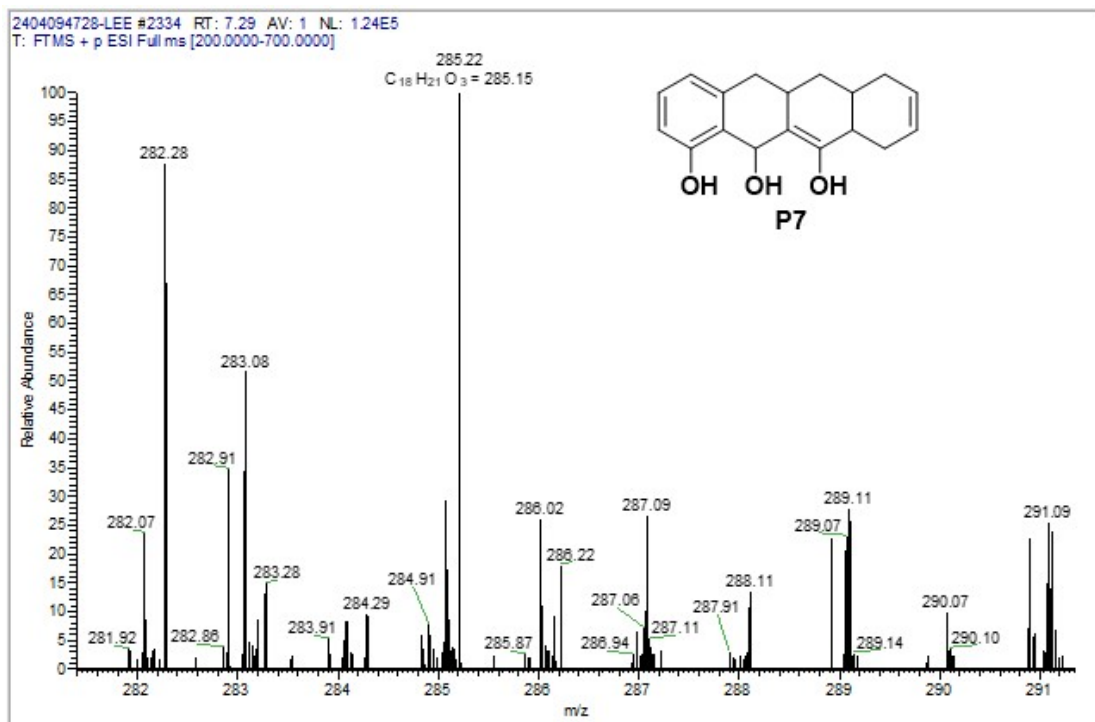

**Fig. S21.** Mass spectrometry analysis of intermediate P7.

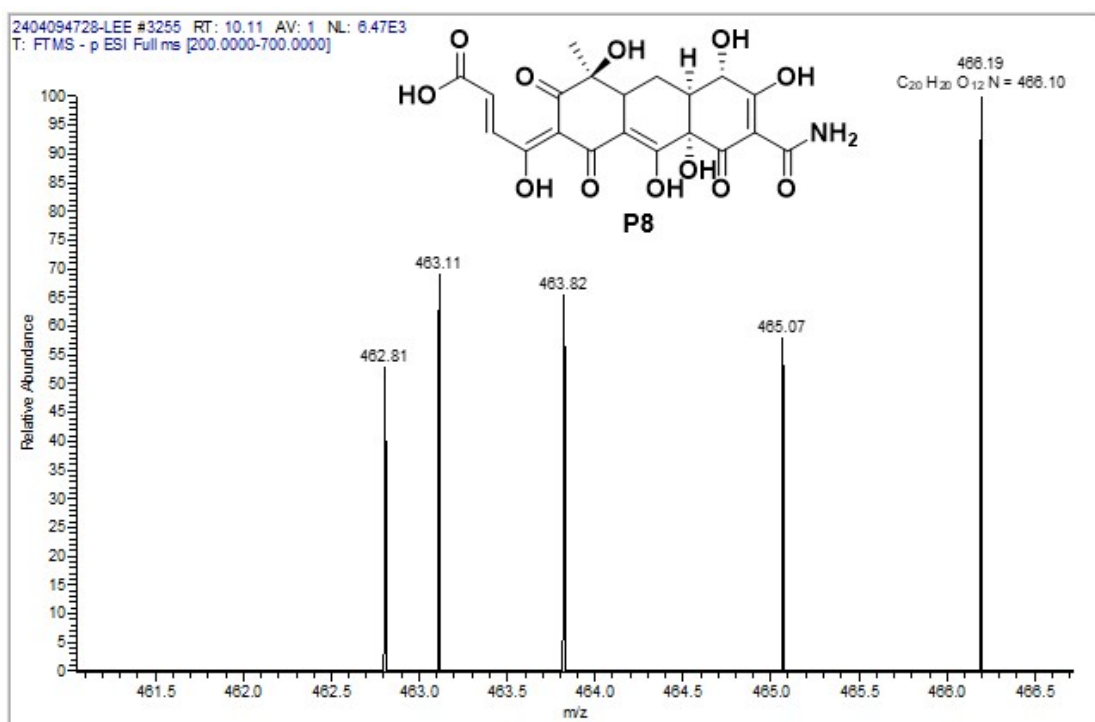

**Fig. S22.** Mass spectrometry analysis of intermediate P8.



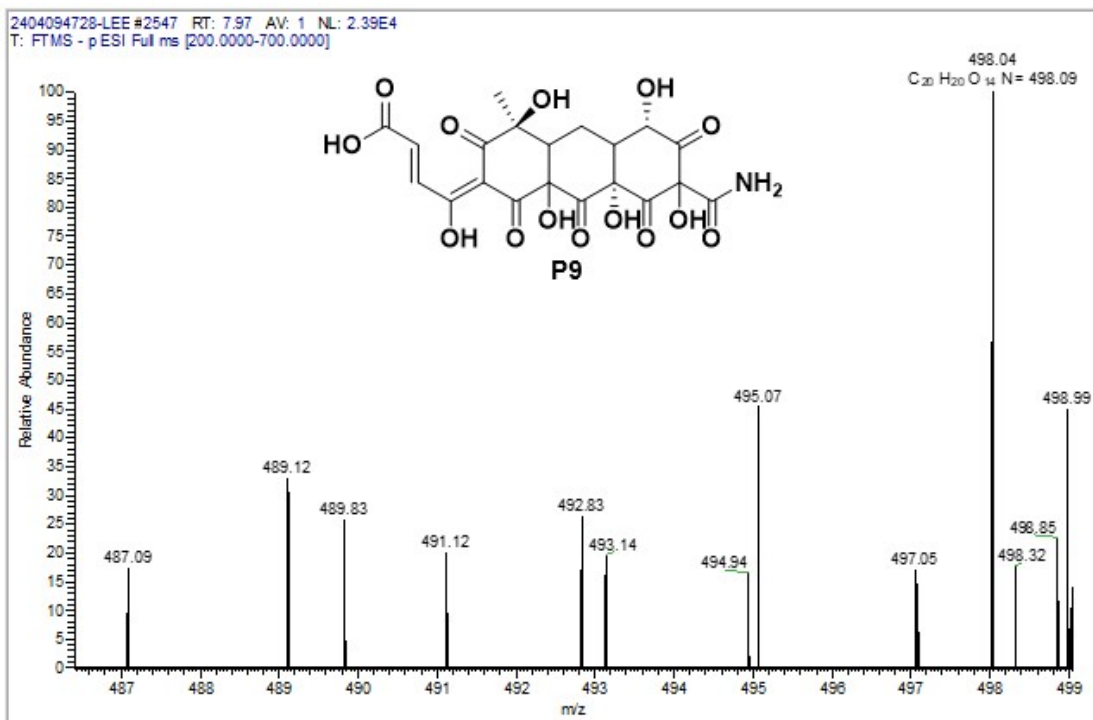

Fig. S23. Mass spectrometry analysis of intermediate P9.

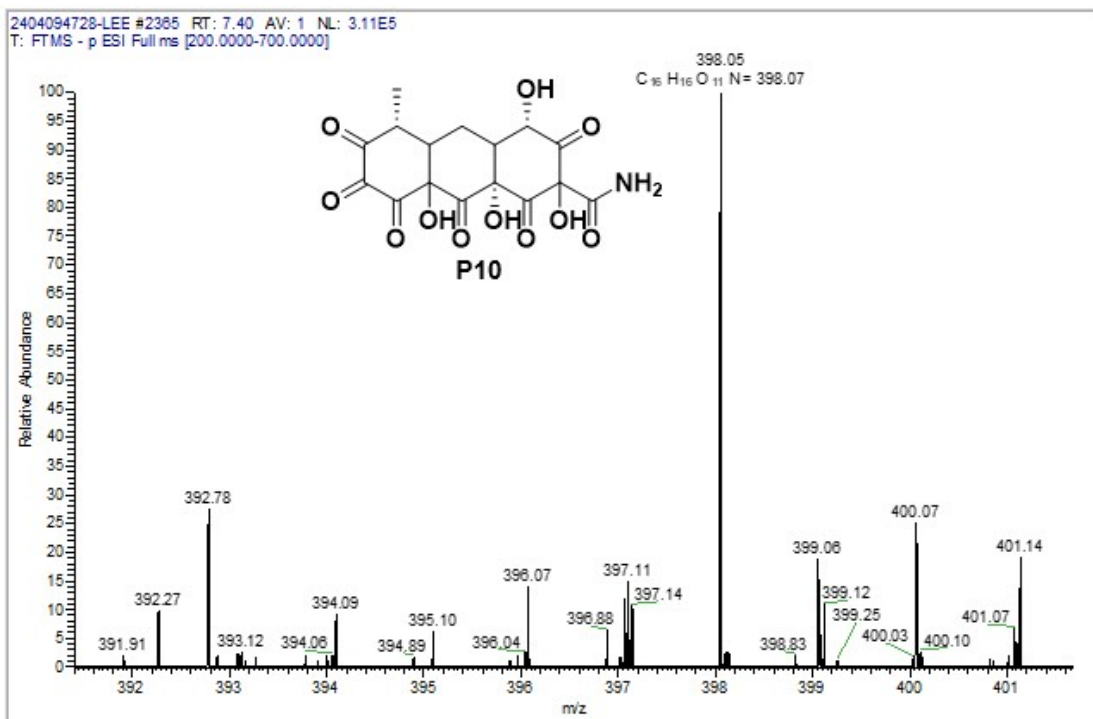

Fig. S24. Mass spectrometry analysis of intermediate P10.

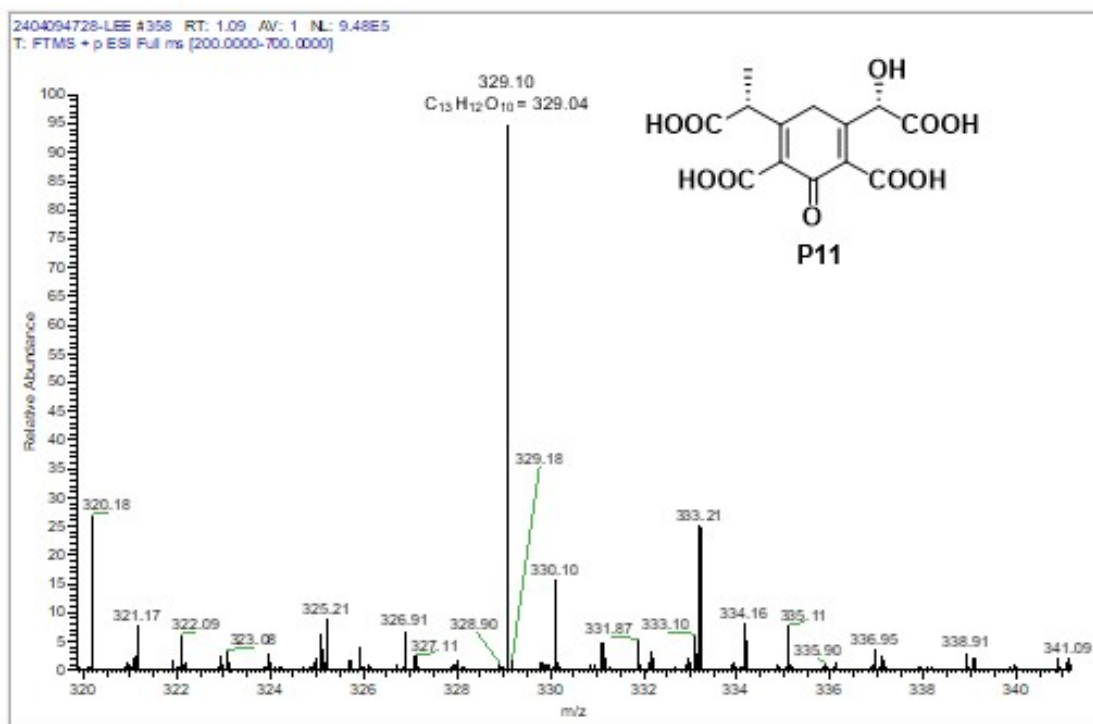

Fig. S25. Mass spectrometry analysis of intermediate P11.

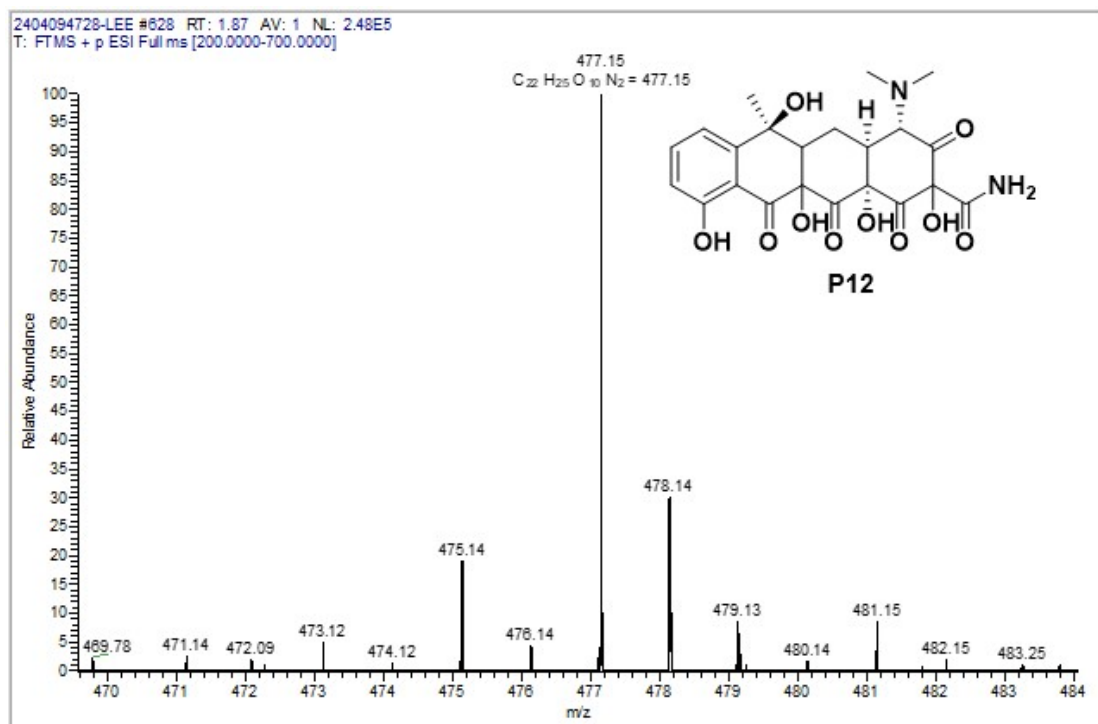

Fig. S26. Mass spectrometry analysis of intermediate P12.

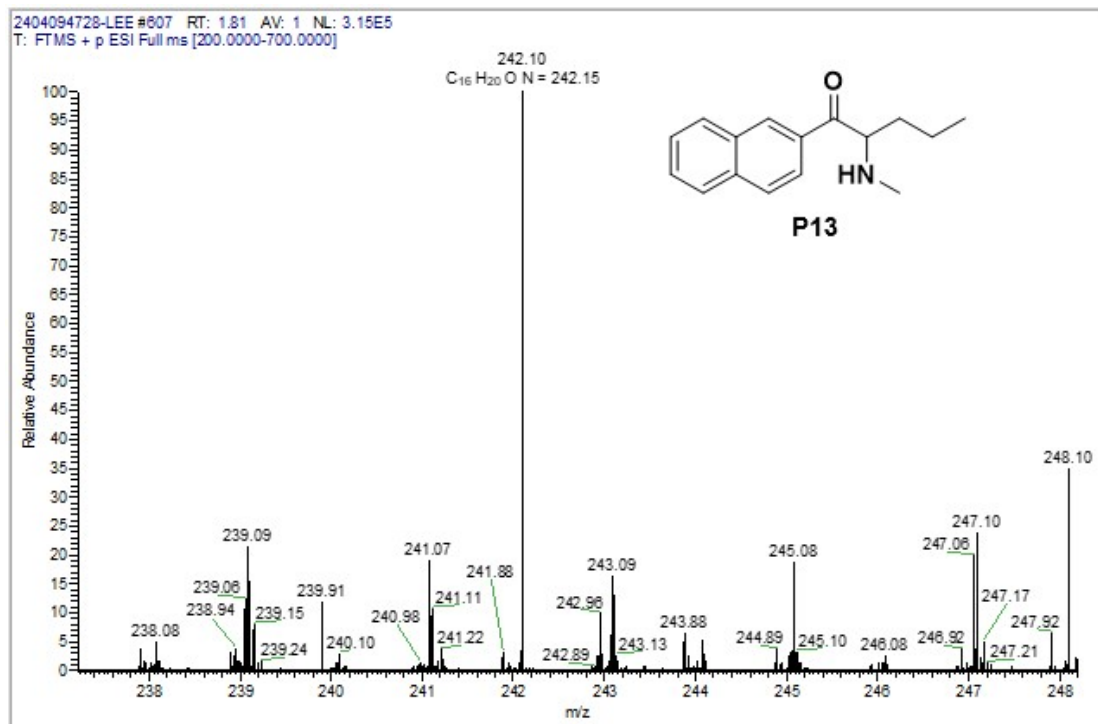

Fig. S27. Mass spectrometry analysis of intermediate P13.

## 6. Mineralization assay

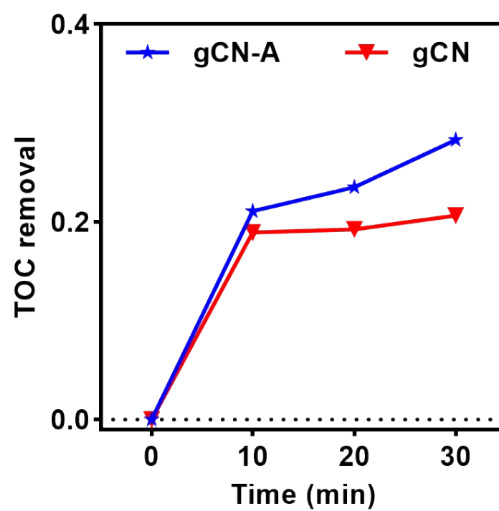

Fig. S28. The TOC removal (%) of TC in gCN and gCN-A.

## 7. Electron-hole calculation

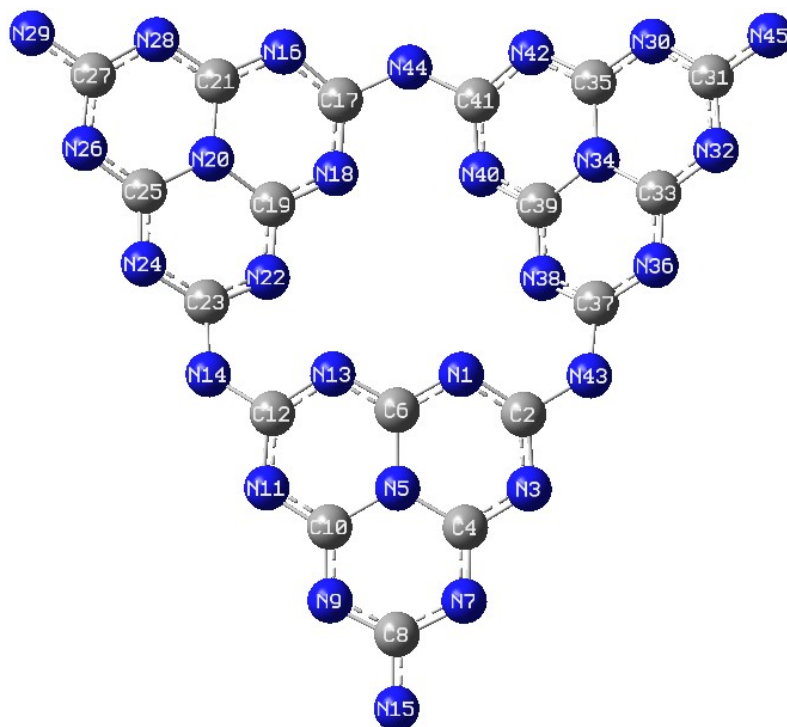

Fig. S29. Unit building structure and atomic number of gCN.

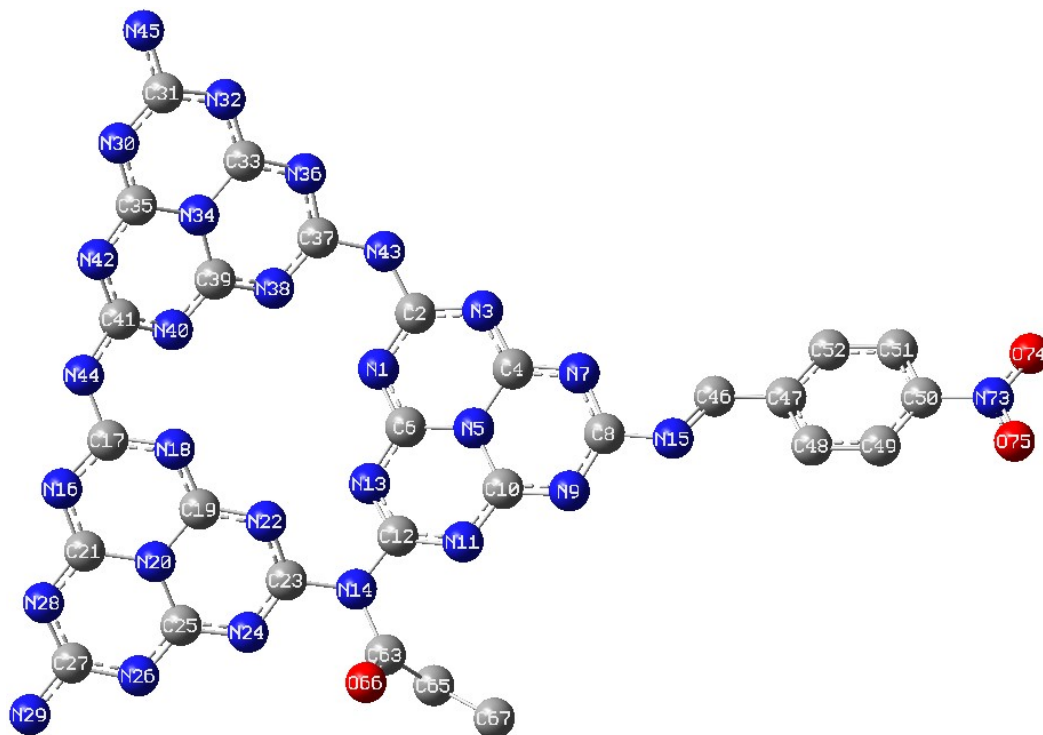

Fig. S30. Unit building structure and atomic number of gCN-A.

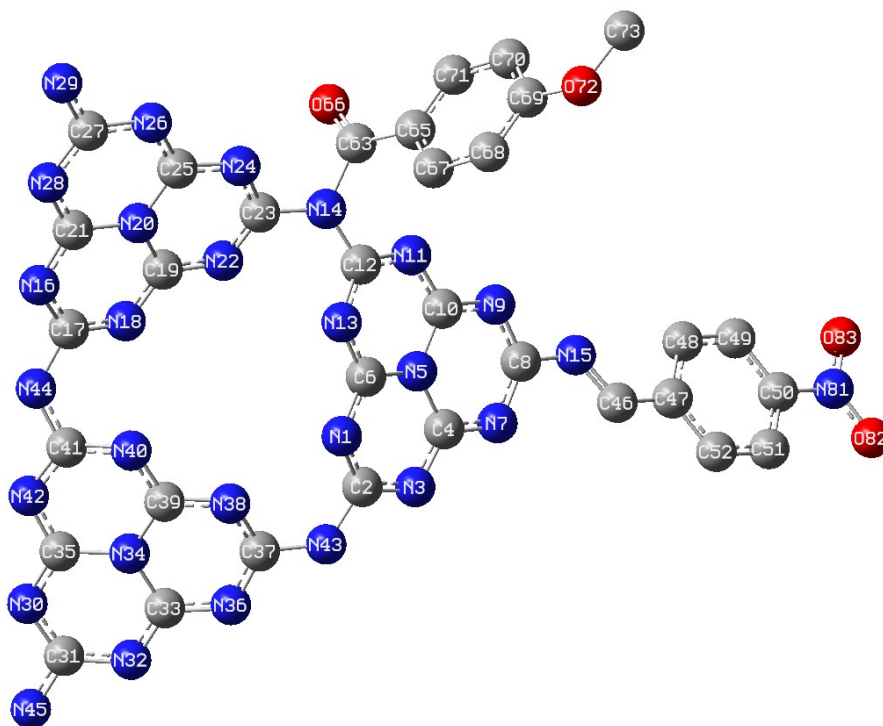

**Fig. S31.** Unit building structure and atomic number of gCN-B.

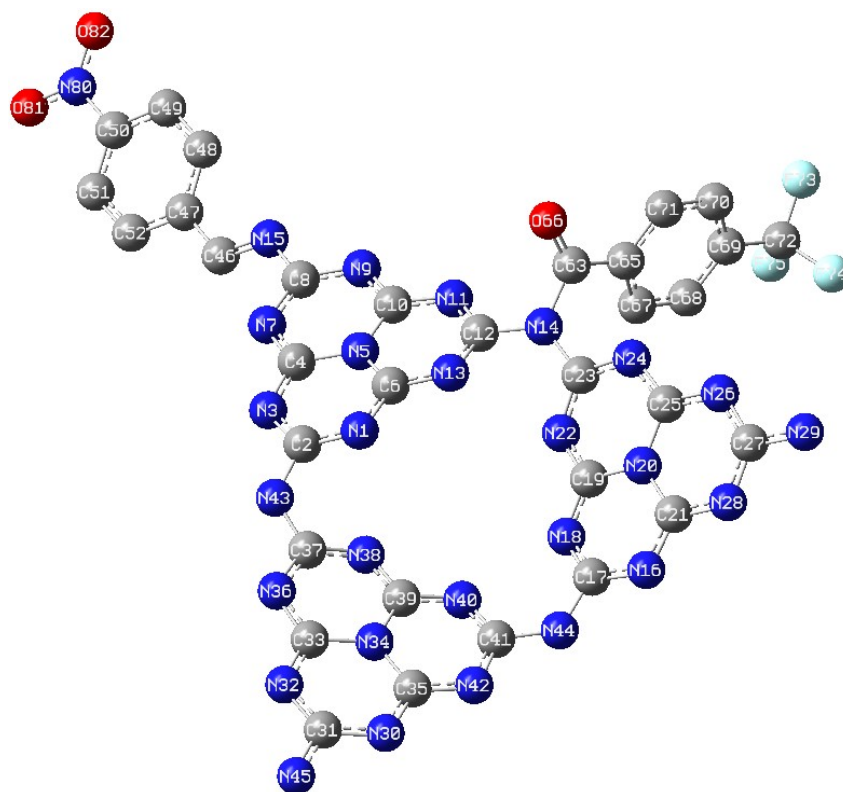

**Fig. S32.** Unit building structure and atomic number of gCN-C.

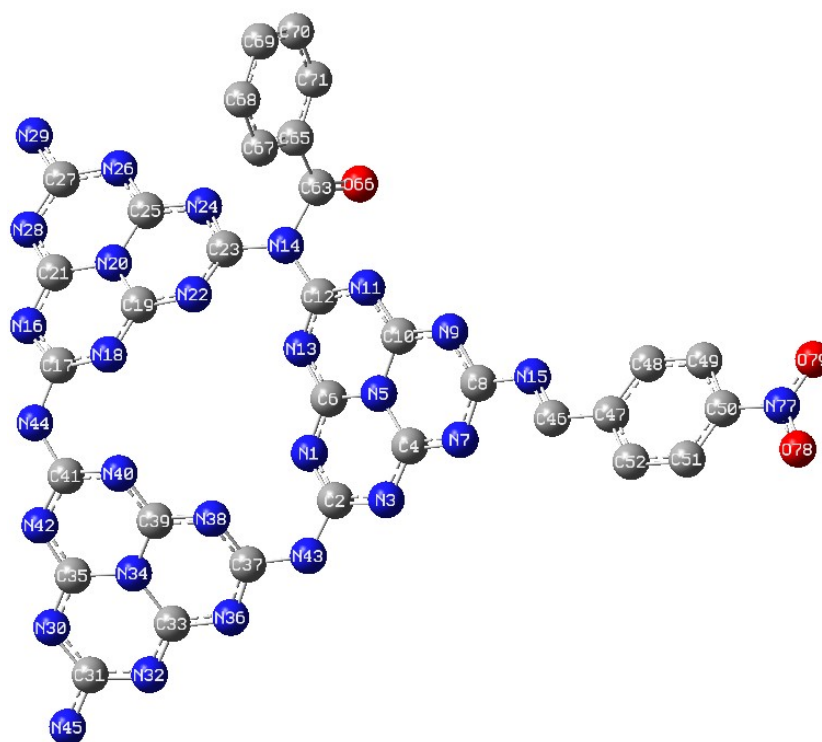

**Fig. S33.** Unit building structure and atomic number of gCN-D.

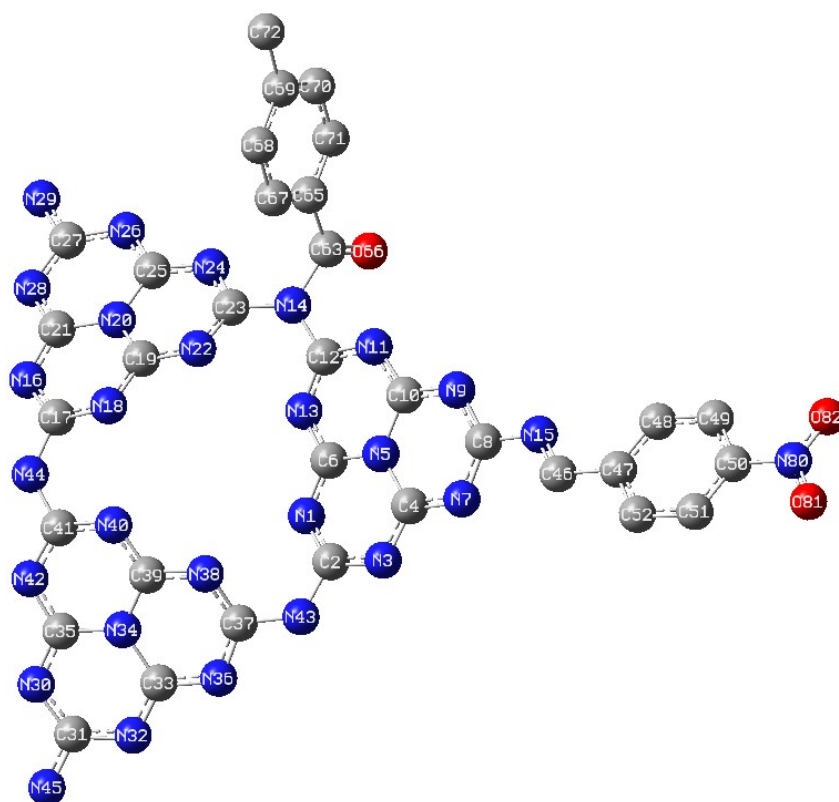

**Fig. S34.** Unit building structure and atomic number of gCN-E.

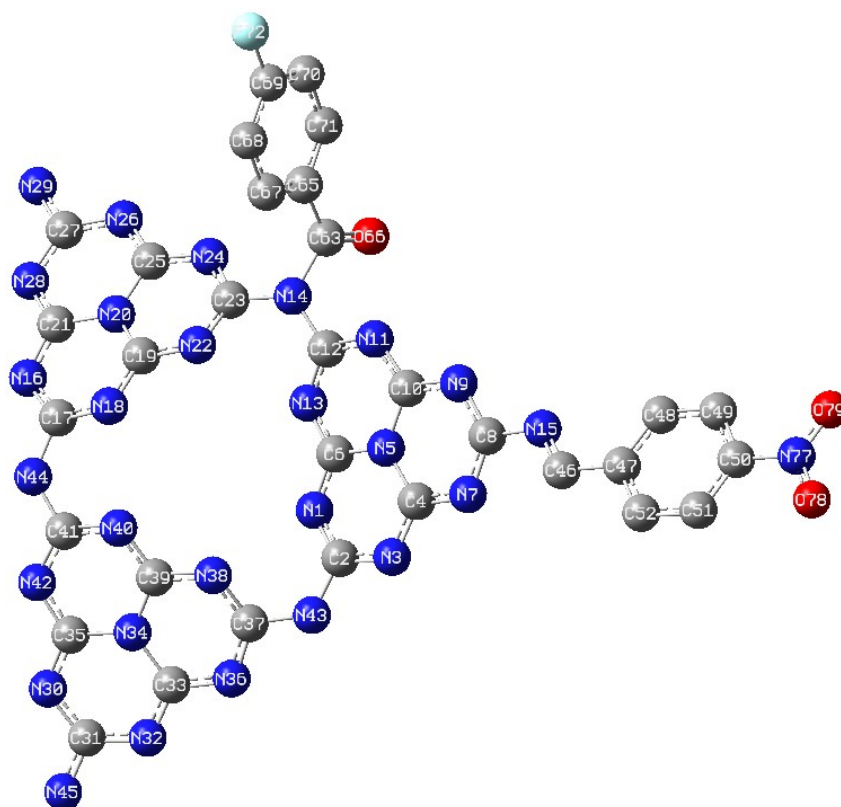

**Fig. S35.** Unit building structure and atomic number of gCN-F.

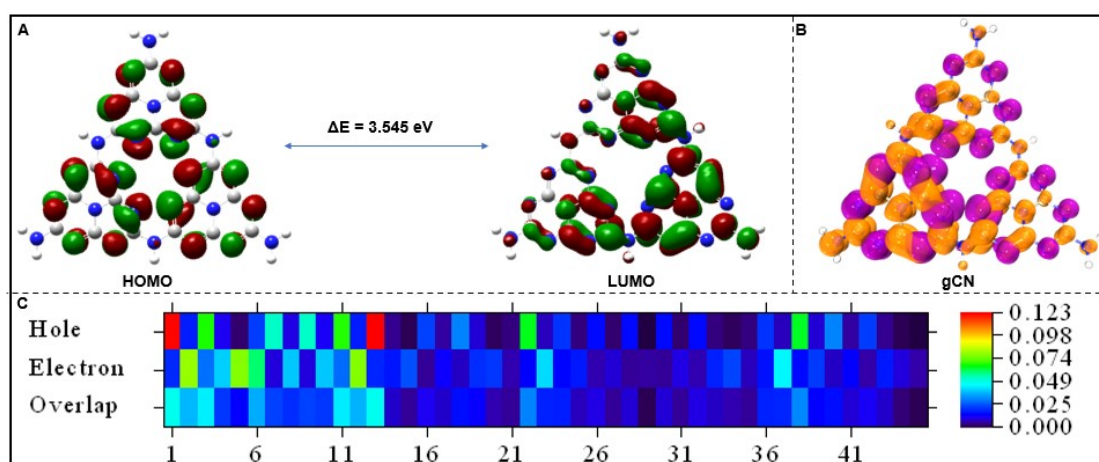

**Fig. S36.** The LUMO, HOMO and electron-hole distributions of gCN and the heat map (first excited state) display.

## 8. ROS observation

Fig. S37 demonstrates that no ROS was detected in the *Psa* cell system under visible light radiation (30 min) with 1% DMSO. In contrast, a weak ROS signal was observed in *Psa* containing gCN, while bacteria treated with gCN-A exhibited an enhanced ROS fluorescence signal, which was further supported by the gCN-A antibacterial evaluation and EPR detection.

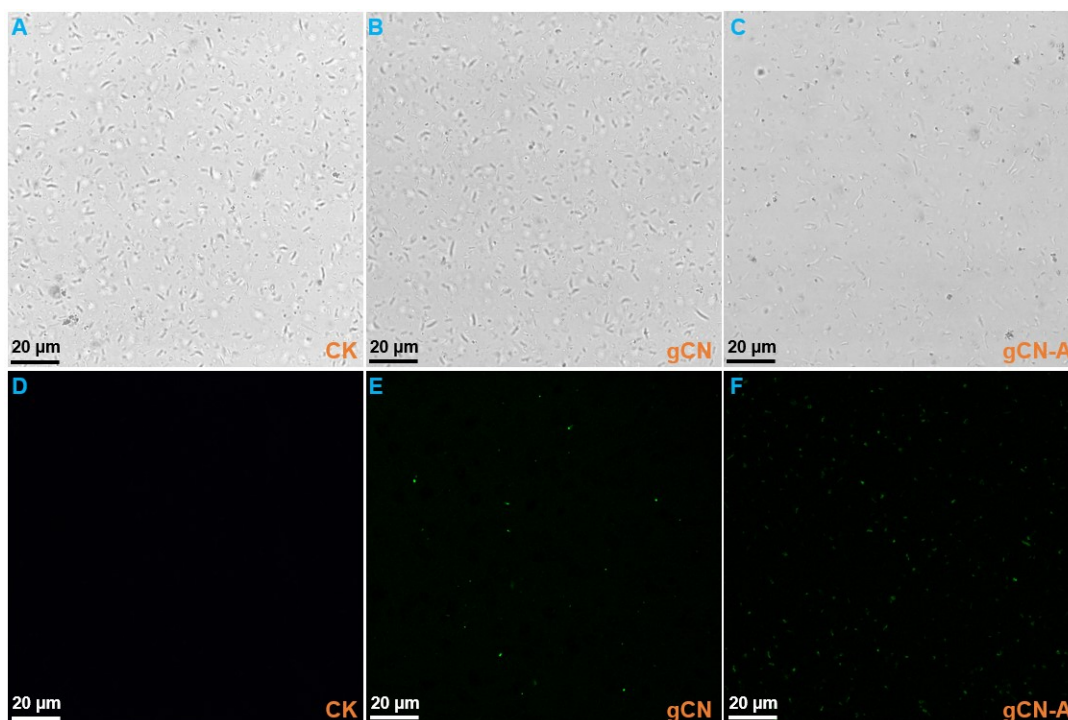

**Fig. S37.** Fluorescence image of the *Psa* cell dyed by CM-H<sub>2</sub>DCFDA after treatment with 1% DMSO (A and D), gCN (B and E) or gCN-A (C and F) for 30 min, respectively. Scale bars = 20 μm.



## 9. Pesticide degradation plant toxicity test

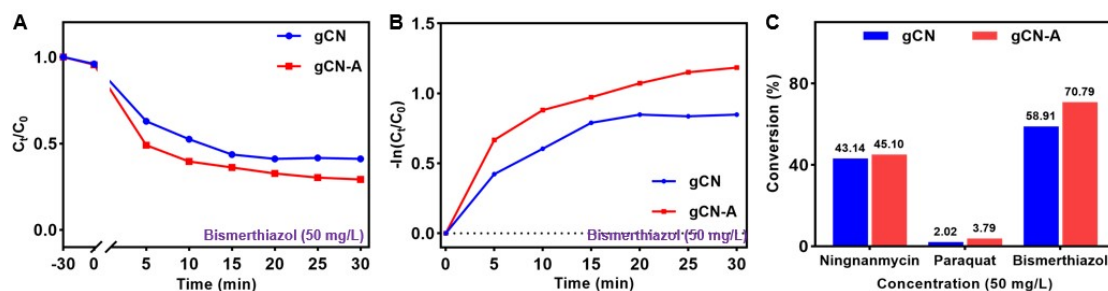

**Fig. S38.** Degradation curve and degradation rate fitting of Bismethiazol by gCN-A under visible light irradiation. Conversion rate of gCN-A to Ningnanmycin, Paraquat, and Bismethiazol at 50 mg/L.

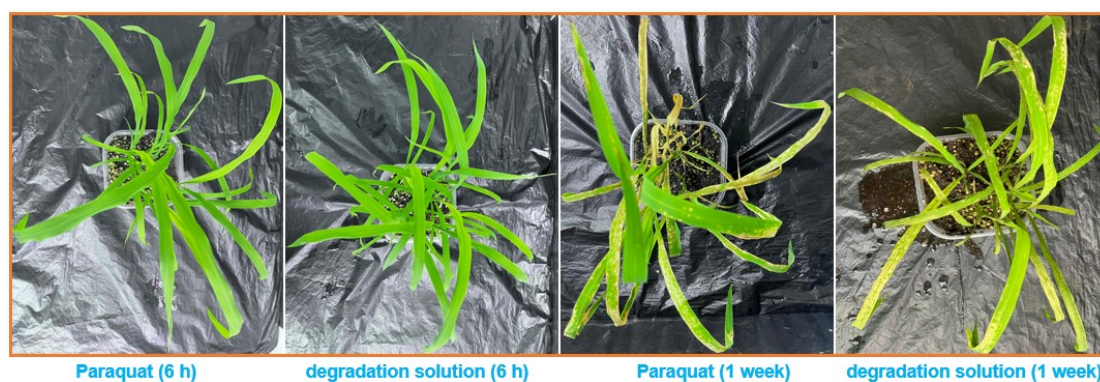

**Fig. S39.** Toxicity of Paraquat solution (50 mg/L) and its degradation products to rice seedlings.

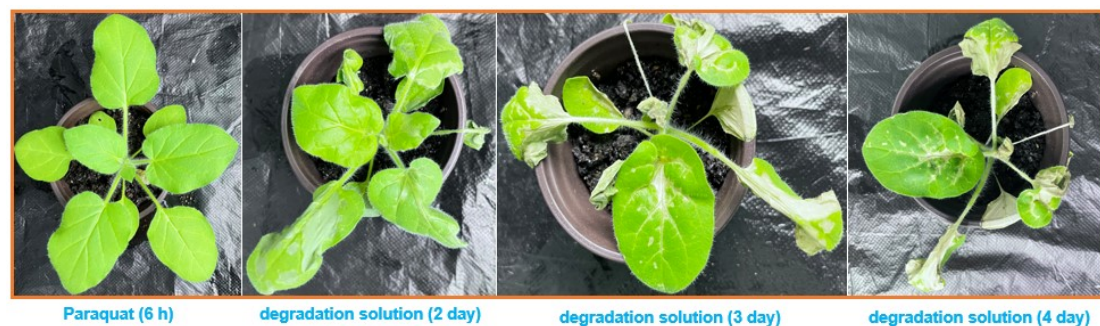

**Fig. S40.** Toxicity of Paraquat solution (50 mg/L) and its degradation products to *Nicotiana glutinosa L.*

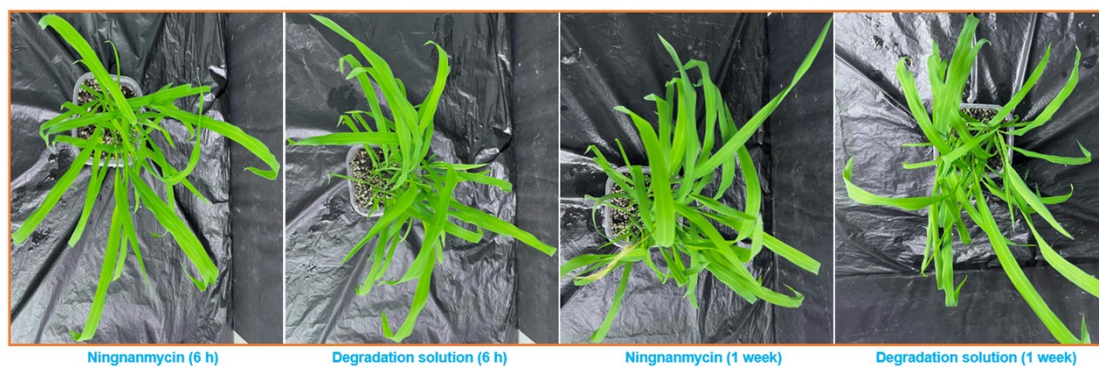

**Fig. S41.** Toxicity of Ningnanmycin solution (50 mg/L) and its degradation products to rice seedlings.

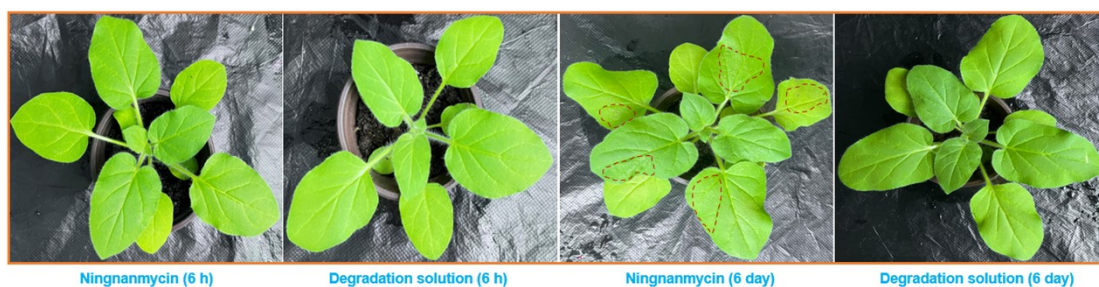

**Fig. S42.** Toxicity of Ningnanmycin solution (50 mg/L) and its degradation products to *Nicotiana glutinosa L.*

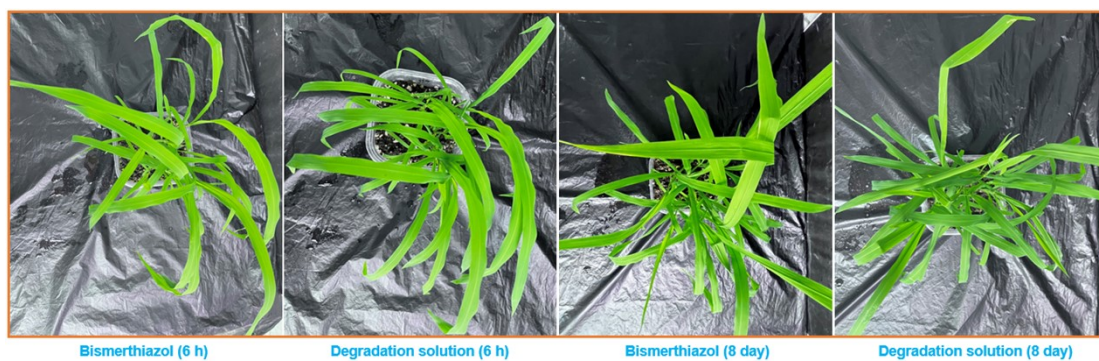

**Fig. S43.** Toxicity of Bismethiazol solution (50 mg/L) and its degradation products to rice seedlings.

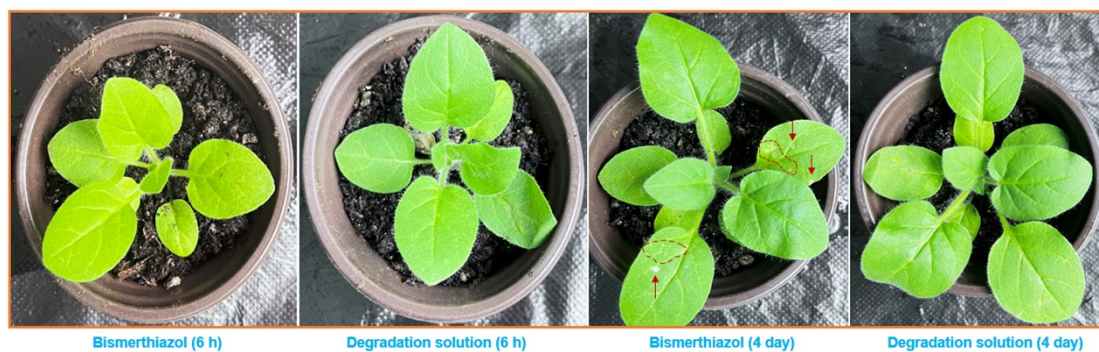

**Fig. S44.** Toxicity of Bismertiazol solution (50 mg/L) and its degradation products to *Nicotiana glutinosa L.*

## 10. Relevant tables

**Table S1.** The BET surface area, average pore size, and pore volume measurement of gCN-based materials.

| Sample | BET surface area (m <sup>2</sup> /g) | Desorption average pore size (nm) | Adsorption average pore size (nm) | pore volume (cm <sup>3</sup> /g) |
|--------|--------------------------------------|-----------------------------------|-----------------------------------|----------------------------------|
| gCN    | 44.645                               | 12.804                            | 13.257                            | 0.124                            |
| gCN580 | 76.507                               | 16.012                            | 17.24                             | 0.319                            |
| gCN-A  | 84.773                               | 18.975                            | 20.424                            | 0.385                            |
| gCN-B  | 91.56                                | 18.498                            | 19.892                            | 0.413                            |
| gCN-C  | 89.375                               | 19.431                            | 20.94                             | 0.421                            |

**Table S2.** DFT calculation of catalyst LUMO-HOMO energy.

| Catalyst | LUMO (au) | LUMO (eV) | HOMO (au) | HOMO (eV) | $\Delta E$ |
|----------|-----------|-----------|-----------|-----------|------------|
| gCN      | -0.097    | -2.631    | -0.227    | -6.176    | 3.545      |
| gCN-A    | -0.135    | -3.683    | -0.238    | -6.475    | 2.792      |
| gCN-B    | -0.133    | -3.607    | -0.234    | -6.375    | 2.769      |
| gCN-C    | -0.136    | -3.692    | -0.241    | -6.556    | 2.864      |
| gCN-D    | -0.133    | -3.608    | -0.237    | -6.434    | 2.827      |
| gCN-E    | -0.132    | -3.592    | -0.236    | -6.410    | 2.818      |
| gCN-F    | -0.134    | -3.647    | -0.239    | -6.490    | 2.843      |

1 au = 1\*27.21138602 eV

**Table S3.** Contribution of each non-hydrogen atom to hole and electron in gCN.

| Atom | Hole (%) | Electron (%) | Overlap | Atom | Hole (%) | Electron (%) | Overlap |
|------|----------|--------------|---------|------|----------|--------------|---------|
| 1    | 12.233   | 1.919        | 4.845   | 24   | 2.064    | 1.497        | 1.758   |
| 2    | 1.754    | 8.005        | 3.747   | 25   | 0.35     | 1.696        | 0.77    |
| 3    | 6.816    | 2.853        | 4.409   | 26   | 1.509    | 0.631        | 0.976   |
| 4    | 1.114    | 4.032        | 2.119   | 27   | 0.285    | 0.905        | 0.507   |
| 5    | 0.246    | 7.836        | 1.387   | 28   | 1.531    | 0.505        | 0.879   |
| 6    | 2.181    | 6.003        | 3.618   | 29   | 0.034    | 0.536        | 0.136   |

|    |        |       |       |    |       |       |       |
|----|--------|-------|-------|----|-------|-------|-------|
| 7  | 5.289  | 0.951 | 2.243 | 30 | 1.506 | 0.511 | 0.877 |
| 8  | 0.981  | 3.931 | 1.963 | 31 | 0.282 | 0.983 | 0.526 |
| 9  | 5.292  | 0.946 | 2.237 | 32 | 1.502 | 0.645 | 0.984 |
| 10 | 1.116  | 3.961 | 2.103 | 33 | 0.348 | 1.823 | 0.797 |
| 11 | 6.833  | 2.806 | 4.379 | 34 | 0.19  | 2.312 | 0.663 |
| 12 | 1.763  | 7.844 | 3.719 | 35 | 0.377 | 0.727 | 0.524 |
| 13 | 12.306 | 1.873 | 4.802 | 36 | 2.061 | 1.619 | 1.827 |
| 14 | 0.447  | 1.668 | 0.864 | 37 | 0.764 | 4.511 | 1.856 |
| 15 | 0.115  | 2.462 | 0.532 | 38 | 6.47  | 1.508 | 3.123 |
| 16 | 2.24   | 0.531 | 1.091 | 39 | 0.903 | 2.143 | 1.391 |
| 17 | 0.571  | 1.28  | 0.855 | 40 | 3.07  | 0.793 | 1.56  |
| 18 | 3.099  | 0.782 | 1.557 | 41 | 0.565 | 1.405 | 0.891 |
| 19 | 0.913  | 1.949 | 1.334 | 42 | 2.2   | 0.59  | 1.14  |
| 20 | 0.192  | 2.094 | 0.635 | 43 | 0.438 | 1.697 | 0.862 |
| 21 | 0.383  | 0.677 | 0.51  | 44 | 0.108 | 0.937 | 0.318 |
| 22 | 6.537  | 1.453 | 3.082 | 45 | 0.034 | 0.59  | 0.142 |
| 23 | 0.771  | 4.2   | 1.799 |    |       |       |       |

**Table S4.** Contribution of each non-hydrogen atom to hole and electron in gCN-A.

| Atom | Hole (%) | Electron (%) | Overlap | Atom | Hole (%) | Electron (%) | Overlap |
|------|----------|--------------|---------|------|----------|--------------|---------|
| 1    | 9.532    | 0.793        | 2.749   | 31   | 0.359    | 0.054        | 0.14    |
| 2    | 1.781    | 1.756        | 1.768   | 32   | 1.796    | 0.083        | 0.386   |
| 3    | 7.832    | 0.651        | 2.258   | 33   | 0.472    | 0.173        | 0.286   |
| 4    | 1.509    | 2.64         | 1.996   | 34   | 0.108    | 0.155        | 0.129   |
| 5    | 0.198    | 4.412        | 0.936   | 35   | 0.374    | 0.039        | 0.121   |
| 6    | 1.897    | 1.416        | 1.639   | 36   | 2.577    | 0.197        | 0.712   |
| 7    | 6.741    | 3.011        | 4.506   | 37   | 0.861    | 0.454        | 0.625   |
| 8    | 1.394    | 7.45         | 3.223   | 38   | 5.521    | 0.23         | 1.126   |
| 9    | 6.454    | 2.929        | 4.348   | 39   | 0.997    | 0.148        | 0.384   |
| 10   | 1.275    | 3.646        | 2.156   | 40   | 4.096    | 0.079        | 0.57    |
| 11   | 6.175    | 0.971        | 2.448   | 41   | 0.649    | 0.056        | 0.191   |
| 12   | 1.583    | 2.386        | 1.944   | 42   | 1.946    | 0.047        | 0.303   |
| 13   | 9.319    | 1.148        | 3.271   | 43   | 0.166    | 0.496        | 0.287   |
| 14   | 0.2      | 0.697        | 0.374   | 44   | 0.204    | 0.034        | 0.083   |
| 15   | 0.116    | 7.729        | 0.947   | 45   | 0.04     | 0.03         | 0.035   |
| 16   | 2.156    | 0.023        | 0.224   | 46   | 0.048    | 12.123       | 0.762   |
| 17   | 0.683    | 0.034        | 0.153   | 47   | 0.009    | 5.085        | 0.216   |
| 18   | 4.285    | 0.052        | 0.471   | 48   | 0.004    | 3.757        | 0.12    |
| 19   | 0.962    | 0.083        | 0.283   | 49   | 0.002    | 2.498        | 0.063   |
| 20   | 0.092    | 0.1          | 0.096   | 50   | 0.004    | 5.366        | 0.142   |
| 21   | 0.407    | 0.03         | 0.111   | 51   | 0.002    | 2.865        | 0.076   |
| 22   | 5.07     | 0.203        | 1.015   | 52   | 0.002    | 3.671        | 0.081   |
| 23   | 0.821    | 0.419        | 0.586   | 63   | 0.071    | 0.19         | 0.116   |
| 24   | 2.632    | 0.175        | 0.678   | 65   | 0.055    | 0.052        | 0.053   |

|    |       |       |       |    |       |       |       |
|----|-------|-------|-------|----|-------|-------|-------|
| 25 | 0.492 | 0.139 | 0.262 | 66 | 0.124 | 0.117 | 0.121 |
| 26 | 1.946 | 0.077 | 0.387 | 67 | 0.013 | 0.014 | 0.013 |
| 27 | 0.393 | 0.047 | 0.135 | 73 | 0     | 5.346 | 0.047 |
| 28 | 1.751 | 0.042 | 0.27  | 74 | 0.001 | 5.598 | 0.06  |
| 29 | 0.037 | 0.026 | 0.031 | 75 | 0.001 | 5.687 | 0.053 |
| 30 | 1.562 | 0.049 | 0.276 | □  | □     | □     | □     |

**Table S5.** Contribution of each non-hydrogen atom to hole and electron in gCN-B.

| Atom | Hole (%) | Electron (%) | Overlap | Atom | Hole (%) | Electron (%) | Overlap |
|------|----------|--------------|---------|------|----------|--------------|---------|
| 1    | 10.356   | 0.765        | 2.815   | 34   | 0.099    | 0.142        | 0.118   |
| 2    | 1.958    | 1.703        | 1.826   | 35   | 0.284    | 0.039        | 0.105   |
| 3    | 8.5      | 0.625        | 2.306   | 36   | 2.073    | 0.183        | 0.617   |
| 4    | 1.647    | 2.556        | 2.052   | 37   | 0.719    | 0.419        | 0.549   |
| 5    | 0.212    | 4.233        | 0.946   | 38   | 4.713    | 0.215        | 1.008   |
| 6    | 2.08     | 1.357        | 1.68    | 39   | 0.83     | 0.137        | 0.337   |
| 7    | 7.465    | 2.839        | 4.604   | 40   | 3.256    | 0.077        | 0.5     |
| 8    | 1.567    | 7.016        | 3.316   | 41   | 0.513    | 0.055        | 0.168   |
| 9    | 7.319    | 2.832        | 4.552   | 42   | 1.437    | 0.038        | 0.234   |
| 10   | 1.459    | 3.421        | 2.234   | 43   | 0.158    | 0.485        | 0.277   |
| 11   | 7.096    | 0.903        | 2.532   | 44   | 0.203    | 0.048        | 0.099   |
| 12   | 1.744    | 2.286        | 1.997   | 45   | 0.035    | 0.028        | 0.031   |
| 13   | 10.293   | 1.11         | 3.379   | 46   | 0.056    | 11.585       | 0.804   |
| 14   | 0.197    | 0.627        | 0.352   | 47   | 0.011    | 5.217        | 0.234   |
| 15   | 0.13     | 7.699        | 1       | 48   | 0.004    | 3.707        | 0.119   |
| 16   | 1.821    | 0.037        | 0.26    | 49   | 0.002    | 2.605        | 0.066   |
| 17   | 0.599    | 0.057        | 0.185   | 50   | 0.003    | 5.411        | 0.133   |
| 18   | 3.692    | 0.064        | 0.486   | 51   | 0.002    | 3.031        | 0.076   |
| 19   | 0.884    | 0.127        | 0.335   | 52   | 0.002    | 3.578        | 0.086   |
| 20   | 0.091    | 0.153        | 0.118   | 63   | 0.098    | 0.135        | 0.115   |
| 21   | 0.343    | 0.045        | 0.124   | 65   | 0.191    | 0.05         | 0.098   |
| 22   | 4.841    | 0.235        | 1.067   | 66   | 0.213    | 0.046        | 0.099   |
| 23   | 0.748    | 0.535        | 0.632   | 67   | 0.065    | 0.031        | 0.045   |
| 24   | 2.225    | 0.221        | 0.701   | 68   | 0.066    | 0.011        | 0.027   |
| 25   | 0.418    | 0.189        | 0.281   | 69   | 0.111    | 0.019        | 0.046   |
| 26   | 1.651    | 0.094        | 0.394   | 70   | 0.082    | 0.024        | 0.044   |
| 27   | 0.331    | 0.068        | 0.15    | 71   | 0.057    | 0.031        | 0.042   |
| 28   | 1.451    | 0.053        | 0.277   | 72   | 0.129    | 0.006        | 0.028   |
| 29   | 0.035    | 0.038        | 0.037   | 73   | 0.012    | 0.001        | 0.003   |
| 30   | 1.197    | 0.045        | 0.231   | 81   | 0        | 5.922        | 0.046   |
| 31   | 0.277    | 0.052        | 0.12    | 82   | 0.001    | 6.124        | 0.058   |
| 32   | 1.375    | 0.074        | 0.318   | 83   | 0        | 6.223        | 0.054   |
| 33   | 0.38     | 0.153        | 0.241   | □    | □        | □            | □       |

**Table S6.** Contribution of each non-hydrogen atom to hole and electron in gCN-C.

| Atom | Hole (%) | Electron (%) | Overlap | Atom | Hole (%) | Electron (%) | Overlap |
|------|----------|--------------|---------|------|----------|--------------|---------|
| 1    | 12.675   | 1.039        | 3.629   | 35   | 0.295    | 0.052        | 0.124   |
| 2    | 2.17     | 2.951        | 2.531   | 36   | 1.82     | 0.345        | 0.792   |
| 3    | 8.908    | 0.827        | 2.713   | 37   | 0.663    | 0.769        | 0.714   |
| 4    | 1.751    | 3.262        | 2.39    | 38   | 5.093    | 0.308        | 1.252   |
| 5    | 0.231    | 5.568        | 1.135   | 39   | 0.788    | 0.223        | 0.42    |
| 6    | 2.472    | 2.202        | 2.333   | 40   | 2.103    | 0.103        | 0.466   |
| 7    | 8.412    | 2.788        | 4.843   | 41   | 0.419    | 0.066        | 0.167   |
| 8    | 1.828    | 7.468        | 3.694   | 42   | 1.53     | 0.072        | 0.331   |
| 9    | 8.84     | 2.849        | 5.018   | 43   | 0.198    | 0.752        | 0.385   |
| 10   | 1.885    | 3.825        | 2.685   | 44   | 0.044    | 0.037        | 0.04    |
| 11   | 9.697    | 0.91         | 2.971   | 45   | 0.037    | 0.032        | 0.034   |
| 12   | 2.232    | 3.307        | 2.717   | 46   | 0.093    | 11.012       | 1.015   |
| 13   | 11.768   | 1.352        | 3.989   | 47   | 0.025    | 4.438        | 0.33    |
| 14   | 0.16     | 0.71         | 0.337   | 48   | 0.009    | 3.307        | 0.169   |
| 15   | 0.243    | 7.068        | 1.311   | 49   | 0.004    | 2.193        | 0.092   |
| 16   | 1.094    | 0.019        | 0.146   | 50   | 0.005    | 4.713        | 0.152   |
| 17   | 0.287    | 0.026        | 0.087   | 51   | 0.003    | 2.453        | 0.084   |
| 18   | 1.406    | 0.053        | 0.273   | 52   | 0.005    | 3.301        | 0.123   |
| 19   | 0.448    | 0.096        | 0.207   | 63   | 0.071    | 0.318        | 0.15    |
| 20   | 0.079    | 0.12         | 0.097   | 65   | 0.02     | 0.046        | 0.03    |
| 21   | 0.211    | 0.032        | 0.083   | 66   | 0.118    | 0.334        | 0.198   |
| 22   | 2.801    | 0.255        | 0.845   | 67   | 0.018    | 0.043        | 0.027   |
| 23   | 0.403    | 0.533        | 0.463   | 68   | 0.006    | 0.012        | 0.009   |
| 24   | 1.076    | 0.198        | 0.462   | 69   | 0.008    | 0.027        | 0.015   |
| 25   | 0.217    | 0.192        | 0.204   | 70   | 0.006    | 0.013        | 0.008   |
| 26   | 0.916    | 0.108        | 0.315   | 71   | 0.009    | 0.025        | 0.015   |
| 27   | 0.183    | 0.059        | 0.104   | 72   | 0.001    | 0.005        | 0.002   |
| 28   | 0.799    | 0.064        | 0.227   | 73   | 0        | 0.001        | 0.001   |
| 29   | 0.021    | 0.03         | 0.025   | 74   | 0.001    | 0.003        | 0.001   |
| 30   | 1.114    | 0.071        | 0.281   | 75   | 0        | 0.001        | 0.001   |
| 31   | 0.264    | 0.062        | 0.128   | 80   | 0.001    | 4.594        | 0.05    |
| 32   | 1.355    | 0.132        | 0.422   | 81   | 0.001    | 4.833        | 0.063   |
| 33   | 0.344    | 0.241        | 0.288   | 82   | 0.001    | 4.902        | 0.069   |
| 34   | 0.159    | 0.209        | 0.182   | □    | □        | □            | □       |

**Table S7.** Contribution of each non-hydrogen atom to hole and electron in gCN-D.

| Atom | Hole (%) | Electron (%) | Overlap | Atom | Hole (%) | Electron (%) | Overlap |
|------|----------|--------------|---------|------|----------|--------------|---------|
| 1    | 12.581   | 0.977        | 3.505   | 33   | 0.311    | 0.246        | 0.277   |
| 2    | 2.184    | 2.567        | 2.368   | 34   | 0.147    | 0.189        | 0.166   |
| 3    | 8.944    | 0.75         | 2.59    | 35   | 0.287    | 0.043        | 0.112   |
| 4    | 1.752    | 3.065        | 2.317   | 36   | 1.615    | 0.268        | 0.658   |

|    |        |       |       |    |       |        |       |
|----|--------|-------|-------|----|-------|--------|-------|
| 5  | 0.223  | 5.122 | 1.07  | 37 | 0.608 | 0.661  | 0.634 |
| 6  | 2.473  | 1.873 | 2.153 | 38 | 4.708 | 0.294  | 1.177 |
| 7  | 8.372  | 2.741 | 4.79  | 39 | 0.732 | 0.158  | 0.34  |
| 8  | 1.819  | 7.332 | 3.652 | 40 | 1.979 | 0.068  | 0.368 |
| 9  | 8.722  | 2.946 | 5.069 | 41 | 0.398 | 0.046  | 0.136 |
| 10 | 1.839  | 3.649 | 2.591 | 42 | 1.475 | 0.042  | 0.25  |
| 11 | 9.378  | 0.856 | 2.833 | 43 | 0.199 | 0.654  | 0.361 |
| 12 | 2.195  | 2.871 | 2.51  | 44 | 0.042 | 0.032  | 0.037 |
| 13 | 11.891 | 1.226 | 3.818 | 45 | 0.029 | 0.041  | 0.034 |
| 14 | 0.176  | 0.671 | 0.344 | 46 | 0.094 | 11.124 | 1.021 |
| 15 | 0.231  | 7.235 | 1.292 | 47 | 0.024 | 4.734  | 0.334 |
| 16 | 1.256  | 0.037 | 0.215 | 48 | 0.008 | 3.341  | 0.165 |
| 17 | 0.337  | 0.035 | 0.109 | 49 | 0.003 | 2.418  | 0.085 |
| 18 | 1.663  | 0.076 | 0.356 | 50 | 0.005 | 4.955  | 0.151 |
| 19 | 0.526  | 0.129 | 0.261 | 51 | 0.002 | 2.615  | 0.079 |
| 20 | 0.092  | 0.125 | 0.107 | 52 | 0.004 | 3.471  | 0.117 |
| 21 | 0.239  | 0.04  | 0.098 | 63 | 0.07  | 0.187  | 0.114 |
| 22 | 3.258  | 0.242 | 0.888 | 65 | 0.036 | 0.019  | 0.026 |
| 23 | 0.46   | 0.561 | 0.508 | 66 | 0.112 | 0.182  | 0.143 |
| 24 | 1.244  | 0.237 | 0.543 | 67 | 0.027 | 0.022  | 0.024 |
| 25 | 0.249  | 0.182 | 0.213 | 68 | 0.012 | 0.007  | 0.009 |
| 26 | 1.035  | 0.116 | 0.346 | 69 | 0.024 | 0.008  | 0.014 |
| 27 | 0.206  | 0.045 | 0.096 | 70 | 0.013 | 0.003  | 0.007 |
| 28 | 0.895  | 0.065 | 0.24  | 71 | 0.016 | 0.007  | 0.011 |
| 29 | 0.023  | 0.021 | 0.022 | 77 | 0.001 | 5.169  | 0.052 |
| 30 | 1.093  | 0.071 | 0.279 | 78 | 0.001 | 5.397  | 0.066 |
| 31 | 0.251  | 0.076 | 0.138 | 79 | 0.001 | 5.459  | 0.068 |
| 32 | 1.252  | 0.122 | 0.391 |    |       |        |       |

**Table S8.** Contribution of each non-hydrogen atom to hole and electron in gCN-E.

| Atom | Hole (%) | Electron (%) | Overlap | Atom | Hole (%) | Electron (%) | Overlap |
|------|----------|--------------|---------|------|----------|--------------|---------|
| 1    | 12.651   | 0.966        | 3.495   | 33   | 0.305    | 0.238        | 0.269   |
| 2    | 2.192    | 2.475        | 2.329   | 34   | 0.152    | 0.182        | 0.166   |
| 3    | 8.853    | 0.735        | 2.552   | 35   | 0.279    | 0.042        | 0.108   |
| 4    | 1.736    | 3.023        | 2.291   | 36   | 1.593    | 0.26         | 0.644   |
| 5    | 0.224    | 4.999        | 1.058   | 37   | 0.612    | 0.64         | 0.626   |
| 6    | 2.48     | 1.789        | 2.106   | 38   | 4.764    | 0.284        | 1.162   |
| 7    | 8.284    | 2.723        | 4.749   | 39   | 0.737    | 0.153        | 0.336   |
| 8    | 1.805    | 7.286        | 3.626   | 40   | 1.95     | 0.066        | 0.359   |
| 9    | 8.667    | 2.972        | 5.076   | 41   | 0.393    | 0.045        | 0.132   |
| 10   | 1.829    | 3.58         | 2.559   | 42   | 1.443    | 0.041        | 0.242   |
| 11   | 9.307    | 0.839        | 2.795   | 43   | 0.212    | 0.629        | 0.365   |
| 12   | 2.185    | 2.747        | 2.45    | 44   | 0.042    | 0.032        | 0.037   |
| 13   | 11.877   | 1.187        | 3.755   | 45   | 0.028    | 0.039        | 0.033   |

|    |       |       |       |    |       |        |       |
|----|-------|-------|-------|----|-------|--------|-------|
| 14 | 0.181 | 0.655 | 0.344 | 46 | 0.093 | 11.163 | 1.017 |
| 15 | 0.229 | 7.294 | 1.293 | 47 | 0.024 | 4.813  | 0.336 |
| 16 | 1.281 | 0.038 | 0.22  | 48 | 0.009 | 3.354  | 0.17  |
| 17 | 0.344 | 0.035 | 0.11  | 49 | 0.004 | 2.477  | 0.093 |
| 18 | 1.689 | 0.077 | 0.36  | 50 | 0.005 | 5.018  | 0.159 |
| 19 | 0.541 | 0.131 | 0.266 | 51 | 0.003 | 2.656  | 0.084 |
| 20 | 0.097 | 0.127 | 0.111 | 52 | 0.005 | 3.519  | 0.129 |
| 21 | 0.244 | 0.041 | 0.1   | 63 | 0.071 | 0.172  | 0.111 |
| 22 | 3.375 | 0.24  | 0.901 | 65 | 0.034 | 0.018  | 0.025 |
| 23 | 0.473 | 0.561 | 0.515 | 66 | 0.132 | 0.165  | 0.148 |
| 24 | 1.304 | 0.237 | 0.557 | 67 | 0.029 | 0.02   | 0.024 |
| 25 | 0.261 | 0.184 | 0.219 | 68 | 0.009 | 0.006  | 0.008 |
| 26 | 1.106 | 0.117 | 0.359 | 69 | 0.02  | 0.007  | 0.012 |
| 27 | 0.216 | 0.045 | 0.099 | 70 | 0.016 | 0.003  | 0.007 |
| 28 | 0.919 | 0.065 | 0.245 | 71 | 0.011 | 0.006  | 0.008 |
| 29 | 0.027 | 0.021 | 0.024 | 72 | 0.004 | 0.001  | 0.002 |
| 30 | 1.032 | 0.069 | 0.267 | 80 | 0.001 | 5.3    | 0.055 |
| 31 | 0.24  | 0.073 | 0.132 | 81 | 0.001 | 5.527  | 0.069 |
| 32 | 1.21  | 0.118 | 0.379 | 82 | 0.001 | 5.585  | 0.074 |

**Table S9.** Contribution of each non-hydrogen atom to hole and electron in gCN-F.

| Atom | Hole (%) | Electron (%) | Overlap | Atom | Hole (%) | Electron (%) | Overlap |
|------|----------|--------------|---------|------|----------|--------------|---------|
| 1    | 12.677   | 0.993        | 3.549   | 33   | 0.323    | 0.256        | 0.287   |
| 2    | 2.186    | 2.685        | 2.423   | 34   | 0.152    | 0.195        | 0.172   |
| 3    | 8.97     | 0.773        | 2.634   | 35   | 0.294    | 0.045        | 0.115   |
| 4    | 1.759    | 3.132        | 2.347   | 36   | 1.694    | 0.278        | 0.687   |
| 5    | 0.227    | 5.289        | 1.095   | 37   | 0.631    | 0.686        | 0.658   |
| 6    | 2.477    | 1.983        | 2.216   | 38   | 4.877    | 0.308        | 1.225   |
| 7    | 8.412    | 2.781        | 4.836   | 39   | 0.757    | 0.163        | 0.351   |
| 8    | 1.82     | 7.422        | 3.676   | 40   | 2.035    | 0.072        | 0.383   |
| 9    | 8.732    | 2.914        | 5.044   | 41   | 0.409    | 0.048        | 0.139   |
| 10   | 1.847    | 3.748        | 2.632   | 42   | 1.516    | 0.043        | 0.256   |
| 11   | 9.457    | 0.88         | 2.886   | 43   | 0.198    | 0.687        | 0.369   |
| 12   | 2.206    | 3.037        | 2.589   | 44   | 0.042    | 0.034        | 0.038   |
| 13   | 11.833   | 1.28         | 3.892   | 45   | 0.03     | 0.042        | 0.036   |
| 14   | 0.172    | 0.692        | 0.345   | 46   | 0.093    | 11.105       | 1.018   |
| 15   | 0.234    | 7.164        | 1.294   | 47   | 0.024    | 4.614        | 0.332   |
| 16   | 1.191    | 0.038        | 0.212   | 48   | 0.009    | 3.319        | 0.17    |
| 17   | 0.319    | 0.038        | 0.11    | 49   | 0.003    | 2.334        | 0.083   |
| 18   | 1.578    | 0.077        | 0.349   | 50   | 0.005    | 4.863        | 0.151   |
| 19   | 0.496    | 0.135        | 0.258   | 51   | 0.003    | 2.545        | 0.086   |
| 20   | 0.085    | 0.132        | 0.106   | 52   | 0.004    | 3.416        | 0.112   |
| 21   | 0.229    | 0.04         | 0.096   | 63   | 0.069    | 0.202        | 0.118   |
| 22   | 3.064    | 0.252        | 0.879   | 65   | 0.021    | 0.021        | 0.021   |



|    |       |       |       |    |       |       |       |
|----|-------|-------|-------|----|-------|-------|-------|
| 23 | 0.434 | 0.584 | 0.503 | 66 | 0.108 | 0.196 | 0.146 |
| 24 | 1.158 | 0.245 | 0.533 | 67 | 0.018 | 0.023 | 0.021 |
| 25 | 0.232 | 0.189 | 0.209 | 68 | 0.006 | 0.007 | 0.006 |
| 26 | 0.965 | 0.118 | 0.337 | 69 | 0.009 | 0.008 | 0.008 |
| 27 | 0.195 | 0.048 | 0.096 | 70 | 0.006 | 0.003 | 0.004 |
| 28 | 0.862 | 0.065 | 0.237 | 71 | 0.008 | 0.008 | 0.008 |
| 29 | 0.02  | 0.022 | 0.021 | 72 | 0.004 | 0.002 | 0.003 |
| 30 | 1.121 | 0.075 | 0.29  | 77 | 0.001 | 4.949 | 0.051 |
| 31 | 0.257 | 0.079 | 0.143 | 78 | 0.001 | 5.184 | 0.068 |
| 32 | 1.282 | 0.128 | 0.405 | 79 | 0.001 | 5.247 | 0.064 |

## 11. References

1. W. B. Shao, R. S. Luo, J. Meng, X. K. Lv, H. M. Xiang, W. L. Xiao, X. Zhou, L. W. Liu, Z. B. Wu, S. Yang, *J. Agric. Food Chem.* **2023**, *71*, 16950–16961.
2. H. W. Liu, S. S. Su, S. Y. Ma, T. Li, W. Fang, Y. Ding, S. T. Liu, J. R. Zhang, H. M. Xiang, X. Zhou, S. Yang, *J. Agric. Food Chem.* **2023**, *71*, 11035-11047.
3. H. W. Wang, X. M. Tang, Y. C. Sun, Z. Huang, L. S. Zhao, *Chem. Eng. J.* **2024**, *480*, 148308.
4. Y. Feng, Y. Tao, J. H. Qu, Y. Zhang, *Chem. Eng. J.* **2023**, *472*, 145053.
5. H. Tu, Y. Xu, S. S. Chen, Y. Wang, S. X. Guo, J. Wu, *Adv. Energy Sustainability Res.* **2024**, 2400175.
6. R. D. Tang, D. X. Gong, Y. C. Deng, S. Xiong, J. F. Zheng, L. Li, Z. P. Zhou, L. Su, J. Zhao, *J. Hazard. Mater.* **2022**, *423*, 126944.
7. Y. Y. Fang, H. Y. Chen, T. Y. Sheng, S. Q. Lv, S. X. Cai, Y. Q. Liu, K. F. Zhang, *Sur. Interfaces* **2024**, *45*, 103848.
